# Supplementary material for: Barriers and facilitators to learn and improve through morbidity and mortality conferences: a qualitative study
Source: PubMed Central journal article supplement — BMJ Open. 2017 Nov 12;7(11):e018833. doi: 10.1136/bmjopen-2017-018833 (PMC5695320; doi:10.1136/bmjopen-2017-018833), 2017-11-12
Supplement: bmjopen-2017-018833.draft_revisions.pdf [file bmjopen-2017-018833.draft_revisions.pdf]

# BMJ Open

BMJ Open is committed to open peer review. As part of this commitment we make the peer review history of every article we publish publicly available.

When an article is published we post the peer reviewers' comments and the authors' responses online. We also post the versions of the paper that were used during peer review. These are the versions that the peer review comments apply to.

The versions of the paper that follow are the versions that were submitted during the peer review process. They are not the versions of record or the final published versions. They should not be cited or distributed as the published version of this manuscript.

BMJ Open is an open access journal and the full, final, typeset and author-corrected version of record of the manuscript is available on our site with no access controls, subscription charges or pay-per-view fees (<http://bmjopen.bmj.com>).

If you have any questions on BMJ Open's open peer review process please email [editorial.bmjopen@bmj.com](mailto:editorial.bmjopen@bmj.com)

# BMJ Open

## Barriers and facilitators to learn and improve through morbidity and mortality conferences (M&M): a qualitative study

|                                 |                                                                                                                                                                                |
|---------------------------------|--------------------------------------------------------------------------------------------------------------------------------------------------------------------------------|
| Journal:                        | <i>BMJ Open</i>                                                                                                                                                                |
| Manuscript ID                   | bmjopen-2017-018833                                                                                                                                                            |
| Article Type:                   | Research                                                                                                                                                                       |
| Date Submitted by the Author:   | 25-Jul-2017                                                                                                                                                                    |
| Complete List of Authors:       | de Vos, Marit S.; Leids Universitair Medisch Centrum, Hamming, Jaap; LUMC, surgery Marang-van de Mheen, Perla; Leiden University Medical Centre, Medical Decision Making, J10S |
| <b>Primary Subject Heading</b>: | Medical education and training                                                                                                                                                 |
| Secondary Subject Heading:      | Qualitative research, Health services research, Surgery                                                                                                                        |
| Keywords:                       | morbidity and mortality conferences, quality improvement, patient safety, continuing education, barriers and facilitators, professionals                                       |
|                                 |                                                                                                                                                                                |

SCHOLARONE™  
Manuscripts

# Barriers and facilitators to learn and improve through morbidity and mortality conferences (M&M): a qualitative study

Marit S. de Vos, MD,<sup>1,2</sup> Jaap F. Hamming, MD, PhD,<sup>1</sup> Perla J. Marang-van de Mheen, PhD<sup>2</sup>

<sup>1</sup> Department of Surgery, <sup>2</sup> Department of Medical Decision Making,  
Leiden University Medical Centre  
*Leiden, the Netherlands*

Address for correspondence:

Marit S. de Vos  
Department of Surgery  
Zone K6-R  
Leiden University Medical Centre  
Albinusdreef 2  
2333 ZA Leiden, the Netherlands  
[m.s.de\\_vos@lumc.nl](mailto:m.s.de_vos@lumc.nl)  
+31 71 529 8529

**Key words:** morbidity and mortality conferences; quality improvement; patient safety; continuing education; barriers and facilitators; professionals; providers.

1  
2  
3 **1 ABSTRACT**  
4  
5  
6

7 **Objectives:** To explore barriers and facilitators to successful morbidity and mortality  
8  
9  
10 conferences (M&M), driving learning and improvement.  
11

12  
13  
14 **Design:** Qualitative study with semi-structured interviews analysed using inductive, thematic  
15  
16 content analysis to identify barriers and facilitators across a pre-existing framework for change  
17  
18 in healthcare.  
19

20  
21  
22  
23 **Setting:** Dutch academic surgical department with a long tradition of M&M.  
24  
25

26  
27 **Participants:** 12 surgeons, surgical residents and a physician assistant  
28  
29

30  
31  
32 **Results:** A total of 57 barriers and facilitators to successful M&M were perceived by surgical  
33  
34 staff, covering 18 themes, varying from 'case type' to 'leadership'. While some related to  
35  
36 M&M organization, other factors concerned individual or social aspects. For 8 factors, of  
37  
38 which 4 at the social level, positive and negative effects were perceived simultaneously, such  
39  
40 as 'hierarchy' and 'team spirit'. Mediating pathways for M&M success were identified,  
41  
42 relating to available *information*; staff *motivation*; and *realization* processes.  
43  
44  
45

46  
47 **Conclusions:** This study provides leads to improve M&M practice, as well as for further  
48  
49 research on key elements of successful M&M. Various factors were perceived to affect M&M  
50  
51 success, of which many individual and social rather than organizational factors, affecting  
52  
53 information and realization processes but also staff motivation. Based on these findings,  
54  
55 practical recommendations were formulated to guide efforts towards best practices for M&M.  
56  
57  
58  
59  
60

### Strengths and limitations of this study

- This is the first qualitative study to assess success factors of morbidity and mortality conferences.
- Strengths of this study design include the use of purposive sampling and data saturation to obtain a diversity of viewpoints and increase the ability to identify all relevant factors.
- Because of the single centre design, some findings may particularly be representative of teaching hospitals and surgical specialties.

## 1 INTRODUCTION

2  
3 The morbidity and mortality conference (M&M) is a deep-rooted tradition in surgery, adopted  
4 by many other medical specialties, aiming to serve both educational and quality improvement  
5 (QI) purposes.<sup>1,2</sup> M&M additionally provides opportunities to teach principles of patient safety  
6 and QI, which are current requirements for residency education.<sup>3-5</sup> Despite similar objectives,  
7 significant variation exists in M&M practice,<sup>1,3</sup> and while case presentations and discussions  
8 may highlight important learning points, implementation and follow-up often receive less  
9 attention, which is a known challenge for many improvement practices in health care.<sup>5-9</sup>

10  
11 M&M practice variation is likely related to the fact that key factors for successful M&M,  
12 driving learning and improvement, remain largely unclear. Factors that have been reported  
13 include organizational aspects, such as a structured approach to review events,<sup>10,11</sup> using  
14 moderators,<sup>2,12-14</sup> and participation of all involved staff,<sup>10,15,16</sup> which were corroborated by  
15 survey studies.<sup>3,17-20</sup> Except for the importance of a safe, blame-free environment,<sup>2,12</sup> the  
16 impact of non-organizational factors, such as team dynamics, has not been considered. While  
17 learning and change theories stipulate that these processes occur at different levels, affected by  
18 various factors, including individual- and team-level factors,<sup>21-24</sup> it remains unknown to what  
19 extent these factors effect learning and improving processes at M&M.

20  
21 We hypothesized that barriers and facilitators to successful M&M, resulting in learning and  
22 improvement, also exist at the individual or social level. To obtain a broad and nuanced  
23 understanding of the complexity of factors influencing M&M success, a qualitative approach  
24 was used. Qualitative studies have rarely been used to study M&M, but can yield rich insights  
25 that may not be revealed by quantitative assessments. The purpose of this study was to enhance

1  
2  
3  
4  
5  
6  
7  
8  
9  
10  
11  
12  
13  
14  
15  
16  
17  
18  
19  
20  
21  
22  
23  
24  
25  
26  
27  
28  
29  
30  
31  
32  
33  
34  
35  
36  
37  
38  
39  
40  
41  
42  
43  
44  
45  
46  
47  
48  
49  
50  
51  
52  
53  
54  
55  
56  
57  
58  
59  
60

- 1 understanding of the barriers, facilitators and mediating pathways to successful M&M, driving
- 2 learning and improvement of clinical practice.

For peer review only

## 1 METHODS

2  
3  
4  
5  
6  
7 A total of 12 semi-structured one-hour interviews were used to identify barriers and facilitators  
8  
9  
10 for successful M&M. This qualitative approach was chosen as it allows exploring perceptions  
11  
12 and encourages participants to share rich descriptions and in-depth information.<sup>25</sup> The number  
13  
14 of 12 interviews was selected because of feasibility and anticipated number needed to reach  
15  
16 data saturation, defined as three consecutive interviews without additional themes emerging.<sup>26</sup>  
17  
18 Purposive sampling was used to invite participants via telephone or email - varying gender,  
19  
20 seniority and surgical subspecialty - to obtain a diversity of viewpoints and hence increase the  
21  
22 ability to identify all relevant barriers and facilitators. Standards for reporting qualitative  
23  
24 research were used to guide reporting of this study.<sup>27</sup> Ethical approval for this type of study was  
25  
26 not required under Dutch national law.  
27  
28  
29

30  
31  
32 All invited agreed to participate, including 6 attending surgeons, 6 surgical residents and 1  
33  
34 physician assistant (PA) (4 females; mean local work experience: 7.2 years [range 1-18 years]).  
35  
36 All worked at the surgical department of a large academic hospital in the Netherlands (882  
37  
38 beds), covering general, endocrine, vascular, gastrointestinal, paediatric, oncologic, trauma  
39  
40 and transplant surgery (all represented in the interview sample). All interviewees had prior  
41  
42 experience with M&M practice at other, mostly teaching, hospitals. The department has a long  
43  
44 tradition of 1-hour departmental M&M meetings, which gathers all faculty, residents,  
45  
46 physician assistants and medical students. More details on the local format for M&M can be  
47  
48 found in prior publications.<sup>28,29</sup> Prior to the interview, participants were informed about the  
49  
50 study objectives and design. Identity of interviewees was kept anonymous to both colleagues  
51  
52 and department chiefs to protect confidentiality and promote openness. A topic guide was  
53  
54 developed to guide the interviews (Appendix 1). First, participants were asked about their  
55  
56  
57  
58  
59  
60



1  
2  
3 1 opinion on M&M and what factors may affect whether learning and improvement occurs.  
4  
5 2 Further questions related to the perceived effect of factors that are most common in the M&M  
6  
7 3 literature, related to the conference's structure (i.e. attendance, culture) and content (i.e. case  
8  
9 4 selection, presentation, moderation, deriving plans).<sup>3,29</sup>  
10  
11 5  
12  
13 6 Each interviewee was interviewed individually in a conference room of a research department  
14  
15 7 in the hospital. Interviews were audiotaped and transcribed in full. Anonymized transcripts  
16  
17 8 were analysed using thematic content analysis with an inductive, data-driven, approach, which  
18  
19 9 involved a recursive process of open coding and collocating codes into themes.<sup>30,31</sup> Coding was  
20  
21 10 performed in ATLAS.ti software (GmbH, Berlin, Germany) by the same researcher who  
22  
23 11 individually conducted the interviews (MdV). This researcher has an MD degree and  
24  
25 12 experience in research on M&M,<sup>29,32</sup> but no professional relationship with interviewees as she  
26  
27 13 is currently not involved in clinical work. A second coder, who was a research assistant with  
28  
29 14 qualitative research experience, independently reviewed all coded transcripts for continuity of  
30  
31 15 data interpretation and any miscoded statements, and discussed with the primary coder until  
32  
33 16 consensus was reached. To guide the analysis, emerging themes were structured across six  
34  
35 17 domains of a pre-existing framework for barriers to and incentives for change in healthcare,  
36  
37 18 developed based on various theories and models for implementing change.<sup>22</sup> Domains  
38  
39 19 included: case (from 'patient'); action (from 'innovation'); individual professional; social;  
40  
41 20 organizational and external context. Frequencies of reported factors were only reported when  
42  
43 21 notably high, low or different between residents and faculty. Factors were assessed for their  
44  
45 22 direction of effect (i.e. facilitator, barrier or both) and their pathways to achieve a successful  
46  
47 23 M&M (i.e. how exactly does this enhance M&M-based learning and improvement?). The  
48  
49 24 mediating pathways for M&M success identified in this study, were subsequently assessed for  
50  
51 25 their relation to existing, more general frameworks for improvement in healthcare.<sup>22</sup>  
52  
53  
54  
55  
56  
57  
58  
59  
60

## 1 RESULTS

2  
3 A total of 57 facilitators and barriers for M&M success were reported by interviewed  
4 professionals (Table 1). All were reported in at least three interviews, and data saturation was  
5 reached at the 10th interview. More facilitators than barriers were reported, with most  
6 facilitators at the case level, and most barriers at the organizational level. Many facilitators  
7 could also serve as a barrier if absent or insufficient (e.g. motivation), but for 8 factors, of  
8 which 4 at the social level, both positive and negative effects were perceived simultaneously  
9 (e.g. hierarchy) (Table 1). Illustrative quotes are provided for all facilitators and barriers in  
10 Appendix 2. Facilitators and barriers were grouped into 17 themes, which will be discussed per  
11 level of the framework of change in healthcare (Table 1).

### 13 Case/action level

14 The type of case discussed and deriving plans for action, were reported as influencing factors.  
15 Cases and actions dealing with clinically relevant and attractive topics (i.e. high  
16 severity/frequency and surgical technical issues) were perceived to increase sense of urgency  
17 to bring about change (Table 1). (*We like that [surgical technique]. We're all very practical*  
18 *people.* [#7]).

19 To enhance information transfer, presenters should be skilful, well-prepared and  
20 supervised, using fixed presentation formats to cover the case, pertinent literature, surgical  
21 skills and more system-level factors involved in the process. M&M was also seen as an  
22 important opportunity to address soft skills, such as communication or emotional impact.  
23 Including local data and trends was perceived to instigate reflection and increase the sense of  
24 urgency (*'(...) about pneumonia, everyone will be like 'oh no, boring', but if you present a*  
25 *concise plan and numbers and those things, then, I think that'd be very nice, because that*

1  
2  
3 1 *concerns everyone.* [#5]). Details regarding context and deliberations in cases should be  
4  
5 2 obtained from those involved, but some residents added that (emotional) involvement might  
6  
7 3 also bias judgment and hinder information accuracy.

8  
9 4 Overall complexity of proposed actions was perceived as a barrier to implementation  
10  
11 5 and considered to increase with the number of people or disciplines involved. Hence plans  
12  
13 6 should be explicit, including a timeline and person in charge. At the same time, however,  
14  
15 7 top-down task assignment could hinder implementation, referred to as ‘mandatory  
16  
17 8 volunteerism’ (*If you just send someone off like ‘you go do that’, that won’t work, it has been*  
18  
19 9 *proven.* [#9]).  
20  
21  
22  
23  
24

### 25 11 **Individual level**

26  
27 12 In various ways, professionals perceived ‘motivation’ as a powerful and important facilitator  
28  
29 13 for M&M, enhancing attendance rates, active participation, and subsequent realization of  
30  
31 14 actions (Table 1). Motivation was considered to improve when M&M covered topics  
32  
33 15 applicable to one’s own practice, field of interest, or if topics were accompanied by a sense of  
34  
35 16 urgency.  
36  
37

38 17 Individual personalities were mentioned as potential facilitators as well as barriers, as  
39  
40 18 for example insecurity may hamper speaking up, while other personality traits could be  
41  
42 19 beneficial. Similarly, personal values and beliefs could enhance or impede motivation to  
43  
44 20 attend, participate and carry out actions. Feedback on actions from prior conferences was  
45  
46 21 considered essential to demonstrate the value of M&M (*‘Did anything change? (...) Feedback*  
47  
48 22 *needs to improve greatly, otherwise it’s so useless.* [#10]).  
49  
50  
51

52 23 A barrier was perceived in that staff may prioritize other activities over M&M, such as  
53  
54 24 clinical work or training duties (mostly mentioned by residents) or subspecialty-related  
55  
56 25 activities (mostly mentioned by faculty) (*‘I’m particularly interested in my own service (i.e.*  
57  
58  
59  
60

1 subspecialty), those are my patients and my trainees. '[#6]). Some noted that it should be  
2 prevented that M&M is considered a 'chore' as this decreases motivation, but others  
3 considered such 'chores' components of professionalism ('(...) some things are chores, but just  
4 need to be done.' [#4]).

## 6 Social level

7 The need for a safe environment to allow an open discussion was often expressed (Table 1). In  
8 this respect, a strong sense of team spirit was considered beneficial (e.g. counting on support  
9 from peers), but also a potential barrier as one may withhold comments to avoid offending a  
10 colleague, referred to as 'back-stabbing' (Appendix 2). Super specialization in surgery was  
11 mentioned by all but one interviewee, and considered to have negatively affected team spirit,  
12 decreasing interest and motivation for topics outside one's subspecialty ('If you talk about  
13 pseudarthrosis, I'm sure no gastro-intestinal or vascular guy really enjoys it.' [#5]). Some  
14 suggested that M&M could therefore cover more general topics or increasingly focus on more  
15 general aspects, such as communication skills or teamwork involved, as these are shared by  
16 different subspecialties.

17 Leadership was assigned a critical role in harnessing this desired culture through  
18 exemplary behaviour and actively lowering barriers to speaking up ('It helps to see that things  
19 at times go wrong even for someone you perhaps admire, some expert.' [#11]). Some believed  
20 that faculty attendance may set an example to juniors, but others believed that mandatory  
21 attendance should be actively reinforced with staff held accountable for absences. All stressed  
22 that leadership should check and reinforce progress of M&M-derived actions, and that  
23 hierarchy helps in this respect. At the same time, hierarchy may serve as a barrier to an open  
24 discussion ('If you really want to promote free speech, then faculty should emphasize that  
25 hierarchy is put aside during such a conference.' [#7]). To steer discussions, promoting a safe

1 atmosphere, the use of moderators was considered helpful.

2           While high attendance rates may serve as a motivator and increase available  
3 information and reach, a smaller audience size may better promote a safe and open  
4 environment. Similarly, audience composition (i.e. who is present) can both positively and  
5 negatively affect the discussion (*'You really think about who is involved and try to predict how  
6 that person will respond. In some cases, you'll decide: well, I'm not going to do that  
7 here.'* [#3]). Specifically, it was considered important to increase interactivity and involve  
8 experts or those involved in cases, to enhance discussion quality and participant experience.  
9 Multidisciplinary participation was considered to provide essential information, but also to  
10 potentially negatively affect openness and level of discussions (*'Well then there might be some  
11 competence differences. Perhaps for some topics it could work, but not in general I'd  
12 say.'* [#9]).

#### 13 14 **Organizational/external level**

15 With regards to the M&M format, a strong focus on improvement and (preceding)  
16 communications was considered beneficial, while handling too many cases was mentioned as a  
17 potential barrier, as it may decrease attention and time for discussing improvements (Table 1).

18 With regards to the setting, most faculty (4/6) advocated for subspecialty rather than  
19 departmental M&M, as it would allow discussions to focus on subspecialist topics, which  
20 would increase participants' motivation and ability to change processes at their own ward.  
21 Moreover, super specialization may currently limit one's ability to attend M&M (*'My weeks  
22 are overloaded with duties related to my subspecialty (...) An unstoppable phenomenon. The  
23 generic conferences suffer from it.'* [#4]).

24           Reporting systems were appreciated for their value to collect local data, but lack of  
25 feedback was considered a missed opportunity to increase sense of urgency for topics and

1 encourage reporting behaviour. Residents currently perceived a barrier in that it was too  
2 labour-intensive and difficult to access local data, while this could provide essential support for  
3 case selection, presentations and follow-up. Many also missed systematic tracking, evaluation  
4 and feedback on prior actions at M&M. (*'A sort of follow-up makes it all more cohesive, of  
5 course, it'll give you the feeling that you're all involved in a sort of improvement cycle rather  
6 than scattershot.'* [#8]).

7 Lack of continuity due to staff turnover was considered to hamper (sustaining)  
8 improvements (*'With varying doctors and trainees, you simply need to repeat things.(...)  
9 another group arrives from another hospital, with a different standard practice, where they  
10 were used to do things differently.'* [#9]). It was suggested, mostly by faculty, to assign  
11 dedicated staff member(s) empowered to monitor data and implement plans for improvement  
12 (*'(...) in task forces because they'll put it on their agenda and have something to say about that  
13 topic, about quality.'* [#11]).

14 General lack of time was mentioned in all but one interview, as an important barrier to  
15 preparation, attendance and realization of actions. Similarly, staff may face too many,  
16 sometimes conflicting, expectations (*'We expect single individuals to fulfil all these  
17 requirements for clinical practice, research, training, leadership and management (...) that's  
18 the inhibiting factor! Too many tasks and too many different tasks.'* [#2]). Receiving dedicated  
19 time to work on tasks arising from M&M was perceived to facilitate these processes. (*'We  
20 rather do it at night to avoid missing surgeries, clinic or clinical... that's the focus of our  
21 training, clinical practice. (...) If we decide, and acknowledge [that M&M is of equal  
22 importance], then I think that we should organize it in such a way that residents receive half a  
23 day to do these things.'* [#7]).

24 Only two external-level factors were reported: the 'nature' of healthcare, balancing  
25 risks and benefits (e.g. haemorrhage and thrombosis prevention) was perceived to hamper

1  
2  
3 1 complete eradication of adverse events, and benchmarking local performance against other  
4  
5 2 centres was often mentioned as an important facilitator, serving as a source of information and  
6  
7 3 motivator.  
8  
9  
10 4

### 11 **Pathways to M&M success**

12  
13  
14 6 The reported facilitators and barriers appeared to enhance or impede whether professionals are:

- 15 7 1) adequately *informed* to identify targets and plans for improvement;
- 16 8 2) *motivated* to participate in, and support, M&M and following actions;
- 17 9 3) (equipped to) actually *realize* plans of action and bring about change.

18  
19  
20  
21  
22  
23  
24  
25 11 Hence, ‘information’, ‘motivation’, and ‘realization’ seemed to serve as potential mediating  
26  
27 12 pathways by which M&M drives learning and improvement (Box 1). These pathways could  
28  
29 13 also affect each other as, for example, information can motivate by increasing sense of  
30  
31 14 urgency, which may enhance realization.  
32  
33  
34  
35  
36  
37  
38  
39  
40  
41  
42  
43  
44  
45  
46  
47  
48  
49  
50  
51  
52  
53  
54  
55  
56  
57  
58  
59  
60

## 1 DISCUSSION

2

3 This qualitative study identified 57 different barriers and facilitators on 17 themes important to  
4 successful M&M practice, perceived by healthcare professionals. Many factors concerned  
5 organizational aspects, but others related to the individual or team level, such as personal  
6 motivation or group dynamics. All factors affected whether participants are: 1) *motivated* to  
7 participate and take action; 2) *well-informed* to identify targets and plans for improvement; and  
8 3) (equipped to) *realize* plans; representing the mediating pathways to M&M-based learning  
9 and improvement.

10

11 An important strength of this study lies in the qualitative approach, which yields nuanced  
12 insights that quantitative assessments cannot reveal. To illustrate, qualitative analyses revealed  
13 the complexity of various factors, such as hierarchy or team spirit, which appeared to have both  
14 positive and negative effects at the same time. Moreover, data saturation was achieved and  
15 many factors and pathways described in the study appeared to closely relate to more general  
16 frameworks and theories of learning and change. An important limitation is the single centre  
17 design of this study. The findings may particularly be representative of teaching hospitals as  
18 interviewees worked at an academic hospital and their prior M&M experience was mostly at  
19 other teaching hospitals. However, qualitative research, does not pursue generalizability, but  
20 rather aims to explore and develop a deeper understanding of a phenomenon of interest. While  
21 interviewees worked in an academic and surgical setting, we believe these findings are relevant  
22 to others as well, as the mechanisms by which clinicians learn and improve through these  
23 conferences are likely more similar. As a previous study showed, expectations and challenges  
24 for M&M are shared among departments with great variation in M&M practice.<sup>29</sup> Moreover,  
25 the study findings appeared to fit well within the more general frameworks for learning and



1  
2  
3 1 improving in healthcare.  
4  
5  
6

7

### 8 **3 Comparison with existing literature**

9  
10 4 While M&M practice has often been subject of study, this is, to our knowledge, the first  
11 5 qualitative study in the field. The present study adds novel insights into the roles of various  
12 6 individual- and social-level factors, perceived as barriers, facilitators or both at the same time  
13 7 (Table 1). An example being ‘team spirit’, important in clinical practice, but perceived as a  
14 8 potential facilitator as well as barrier to openly voicing one’s opinions or concerns at M&M.  
15 9 Thus far, individual or team-level factors have received scant attention in the M&M literature,  
16 10 with the exception of the importance of ‘a blame-free culture’.<sup>2,5,12,20,33</sup> This study confirms the  
17 11 importance of a ‘safe environment’, but also provides leads about what the desired culture or  
18 12 ‘mindset’ for M&M encompasses. It seems that M&M should not only *elicit* input from all  
19 13 participants,<sup>10,15,16</sup> but also truly *value* input from all corners. In other words, attention needs to  
20 14 be given to both the *sender* and *receiver* end to harness a truly open mindset at the conference.  
21 15 The value of input from other disciplines was appreciated by interviewed professionals, but  
22 16 multidisciplinary was also perceived as a potential threat to the open environment that is so  
23 17 important for M&M. This finding adds nuance to previous studies advocating for  
24 18 multidisciplinary M&M, expecting only positive effects.<sup>10,33–35</sup>

25 19 This study revealed three mediating pathways by which M&M may successfully drive  
26 20 learning and improvement, related to information, motivation and realization (Box 1). While  
27 21 the role of motivation has received little attention in prior M&M research, more general  
28 22 publications about organizational learning or improvement have stressed the important role of  
29 23 individual and team factors, such as motivation.<sup>21–24</sup> After all, leadership can create strategies  
30 24 and improvement plans, but this will be insufficient without commitment and support of  
31 25 front-line staff - ‘culture eats strategy for breakfast’.<sup>24,36,37</sup> Pathways to M&M success

1 described by this study, appeared to closely relate to more general frameworks for  
2 improvement and implementation in healthcare (Appendix 3). We attempted to translate the  
3 findings of this qualitative study to actionable recommendations, enlisted in Box 2, targeting  
4 one or more of the described pathways to M&M success (Appendix 3). Some of these  
5 recommendations have been reported in prior M&M studies, such as using local data<sup>38,39</sup> and  
6 extensive planning,<sup>10</sup> but others more closely relate to learning behaviour literature, such as  
7 sense of urgency, motivation and being receptive to new ideas.<sup>21,23,24,37</sup>

### 9 **Implications for M&M practice**

10 The recommendations formulated based on the study findings, address some aspects of M&M  
11 organization, but also aim to target challenges at the level of the (individual) professionals  
12 (Box 2). Various complexities embedded in healthcare culture may complicate M&M practice,  
13 one of which is working with colleagues with different hierarchical or expertise levels. These  
14 professional boundaries might be overcome by promoting the 'desired mindset' for M&M. As  
15 with the 'culture of shame and blame', which used to be infamous for its presence at M&M,  
16 these issues could be targeted with, for example, moderators and local leadership, guided by  
17 principles of Just Culture.<sup>40,41</sup> As mentioned in the interviews, seniors or leaders can model  
18 desired behaviour and attitudes at M&M, by openly discussing personal errors and addressing  
19 the emotional impact. This is confirmed by the, to our knowledge, only other qualitative study  
20 of M&M, conducted in internal medicine, which described this type of role-modelling at the  
21 conference.<sup>42</sup>

22 An important question for future research appears to be how to motivate and engage all  
23 participants to receive the necessary input and support to actually improve clinical practice.  
24 Interviews reflected the paradoxical nature of hierarchy in this respect, as this can both help  
25 and hurt staff's motivation and support. Another solution may be to organize M&M in smaller,

1  
2  
3 1 focused settings, such as subspecialties<sup>15</sup> or integrated care. Interviewees also perceived  
4  
5 2 motivational effects of reviewing local or benchmark data and follow-up of prior plans for  
6  
7 3 improvement, which could be incorporated into conferences to motivate participants and  
8  
9 4 demonstrate the value of M&M.<sup>5,20</sup> In practice, time for feedback and assessment of prior  
10  
11 5 initiatives would mean that fewer topics can be discussed at M&M or that extra time needs to  
12  
13 6 be made available, but this would both be worthwhile considering the expected positive effects  
14  
15 7 on achieving sustainable improvements.  
16  
17  
18  
19  
20

## 21 **CONCLUSION**

22  
23 10 This study enhanced understanding of the factors influencing M&M-based learning and  
24  
25 11 improvement, and the pathways by which this occurs. Many factors were related to the  
26  
27 12 individual or team rather than how M&M is organized. These insights may be used to improve  
28  
29 13 M&M practices, and provide a framework for further study on determinants of M&M success.  
30  
31 14 Future research is warranted to investigate success factors for M&M, and specifically the  
32  
33 15 extent to which these are transferable to other settings, in order to design a universally  
34  
35 16 applicable best practice for M&M.  
36  
37  
38  
39  
40  
41  
42  
43  
44  
45  
46  
47  
48  
49  
50  
51  
52  
53  
54  
55  
56  
57  
58  
59  
60

## APPENDICES

- **Appendix 1:** Topic list for semi-structured interviews with attending surgeons and residents.
- **Appendix 2:** Facilitators and barriers for successful M&M at different levels for achieving change in healthcare with illustrative quotes.
- **Appendix 3:** Relation of published frameworks for improvement in healthcare to this study's model of mediating pathways and practical recommendations.

## LIST OF ABBREVIATIONS

- M&M, morbidity and mortality conference(s)
- QI, quality improvement
- PA, physician assistant

## DECLARATIONS

**Ethical approval and consent to participate:** not required under Dutch law for this type of study. All interviewed professionals verbally consent to participate in this study.

**Consent for publication:** Not applicable.

**Data sharing statement:** Qualitative data generated and analysed in the current study are verbatim transcripts (in Dutch) and are not publicly available to protect the privacy of interviewees.

**Competing interest:** The authors declare that they have no competing interests.

**Funding:** This work was supported by a combined unrestricted grant from the board of directors of the Leiden University Medical Centre, Vogelgezag Foundation (no. 1519-01), Leiden University Fund (no. 5265/12-11-15) and the Michäel-Van Vloten Surgery Fund. Funders had no role in the study design; data analysis interpretation; writing of the report; or in the decision to submit the article for publication.

**Contributorship:** All authors (MdV, JH, PM) contributed to conception and design of this study. MdV generated, analysed and interpreted the data, wrote the first draft and revised drafts. JH revised the draft papers. PM supervised data analysis and interpretation and revised the draft paper. All authors have seen and approved the final draft. All authors received access to all the anonymized data in the study and take responsibility for the integrity and the accuracy of the data analysis. PM is guarantor.

**Acknowledgments:** We like to show our gratitude to all faculty and residents willing to reflect and express their opinions so openly during the interviews. We thank Judith van Grafhorst for her valuable assistance with the interview transcriptions and analyses.

## REFERENCES

1. Xiong X, Johnson T, Jayaraman D, Mcdonald EG, Martel M, et al. At the Crossroad with Morbidity and Mortality Conferences: Lessons Learned through a Narrative Systematic Review. *Can J Gastroenterol Hepatol*. 2016; doi:10.1155/2016/7679196.
2. Orlander JD, Barber TW, Fincke BG. The morbidity and mortality conference: the delicate nature of learning from error. *Acad Med*. 2002;77:1001-6.
3. Aboumatar H, Blackledge C, Dickson C, Heitmiller E, Freischlag J, Pronovost PJ. A Descriptive Study of Morbidity and Mortality Conferences and Their Conformity to Medical Incident Analysis Models: Results of the Morbidity and Mortality Conference Improvement Study, Phase 1. *Am J Med Qual*. 2007;22:232-8.
4. Nasca T, Philibert I, Brigham T, Flynn T. The Next GME Accreditation System — Rationale and Benefits. *N Engl J Med*. 2012;366:1051-6.
5. Sacks GD, Lawson EH, Tillou A, Hines OJ. Morbidity and Mortality Conference 2.0. *Ann Surg* 2015;262:228-9.
6. Macrae C. The problem with incident reporting. *BMJ Qual Saf* 2015; doi:10.1136/bmjqs-2015-004732
7. Cooke DL, Dunscombe PB, Lee RC. Using a survey of incident reporting and learning practices to improve organisational learning at a cancer care centre. *Qual Saf Heal Care*. 2007;16:342-8.
8. Ginsburg LR, Chuang YT, Norton PG, Berta W, Tregunno D, Ng P, Richardson J. Development of a measure of patient safety event learning responses: Patient safety and public health. *Health Serv Res*. 2009;44:2123-47.
9. Vincent C. Understanding and Responding to Adverse Events. *N Engl J Med*. 2003;348:1051-6.
10. Bal G, Sellier E, Tchouda SD, François P. Improving quality of care and patient safety through morbidity and mortality conferences. *J Healthc Qual*. 2014;36:29–36.

- 1  
2  
3 11. François P, Prate F, Vidal-Trecan G, Quaranta J-F, Labarere J, Sellier E. Characteristics of  
4 morbidity and mortality conferences associated with the implementation of patient safety  
5 improvement initiatives, an observational study. *BMC Health Serv Res.* 2016;  
6  
7 doi:10.1186/s12913-016-1279-8.  
8  
9
- 10  
11 12. Bechtold ML, Scott S, Dellsperger KC, Hall LW, Nelson K, Cox KR. Educational quality  
12 improvement report: outcomes from a revised morbidity and mortality format that emphasised  
13 patient safety. *Postgrad Med J.* 2008;84:211-6.  
14  
15
- 16  
17 13. Gordon L. *Gordon's Guide to the Surgical Morbidity and Mortality Conference.* Philadelphia,  
18 PA, USA: Hanley and Belfus; 1994.  
19  
20
- 21  
22 14. Murayama KM, Derossis AM, DaRosa DA, Sherman HB, Fryer JP. A critical evaluation of the  
23 morbidity and mortality conference. *Am J Surg.* 2002;183:246-50.  
24  
25
- 26  
27 15. Gore DC. National survey of surgical morbidity and mortality conferences. *Am J Surg.*  
28  
29 2006;191:708-14.  
30  
31
- 32  
33 16. Risucci DA, Sullivan T, DiRusso S, Savino JA. Assessing educational validity of the Morbidity  
34 and Mortality conference: a pilot study. *Curr Surg.* 2003;60:204-9.  
35  
36
- 37  
38 17. Lecoanet A, Vidal-Trecan G, Prate F, Quaranta J-F, Sellier E, Guyomard A, et al. Assessment of  
39 the contribution of morbidity and mortality conferences to quality and safety improvement: a  
40 survey of participants' perceptions. *BMC Health Serv Res.* 2016;  
41  
42 doi:10.1186/s12913-016-1431-5.  
43  
44
- 45  
46 18. Harbison SP, Regehr G. Faculty and resident opinions regarding the role of morbidity and  
47 mortality conference. *Am J Surg.* 1999;177:136-9.  
48  
49
- 50  
51 19. Kim MJ, Fleming FJ, Peters JH, Salloum RM, Monson JR, Eghbali ME. Improvement in  
52 educational effectiveness of morbidity and mortality conferences with structured presentation  
53 and analysis of complications. *J Surg Educ.* 2010;67:400-5.  
54  
55
- 56  
57 20. Flynn-O'Brien KT, Mandell SP, Eaton E Van, Schleyer AM, McIntyre LK. Surgery and  
58  
59  
60

- 1  
2  
3 Medicine Residents' Perspectives of Morbidity and Mortality Conference: An Interdisciplinary  
4 Approach to Improve ACGME Core Competency Compliance. *J Surg Educ.* 2015;72:258-66.  
5  
6  
7  
8 21. Chuang Y-T, Ginsburg L, Berta WB. Learning from preventable adverse events in health care  
9 organizations: development of a multilevel model of learning and propositions. *Health Care*  
10 *Manage Rev.* 2007;32:330-40.  
11  
12  
13  
14 22. Grol R, Wensing M. What drives change? Barriers to and incentives for achieving  
15 evidence-based practice. *Med J Aust.* 2004;180:57-60.  
16  
17  
18  
19 23. Gibson C, Vermeulen F. A Healthy Divide : Subgroups as a Stimulus for Team Learning  
20 Behavior. *Adm Sci Q.* 2003;48:202-39.  
21  
22  
23  
24 24. Carroll J, Edmondson A. Leading organisational learning in health care. *Qual Saf Heal Care.*  
25 2002;11:51-56.  
26  
27  
28  
29 25. DiCicco-Bloom B, Crabtree BF. The qualitative research interview. *Med Educ.*  
30 2006;40:314-21.  
31  
32  
33 26. Francis JJ, Johnston M, Robertson C, Glidewell L, Entwistle V, Eccles MP, et al. What is an  
34 adequate sample size? Operationalising data saturation for theory-based interview studies.  
35 *Psychol Health.* 2010;25:1229-45.  
36  
37  
38  
39 27. O'Brien BC, Harris IB, Beckman TJ, Reed DA, Cook DA. Standards for Reporting Qualitative  
40 Research : *Acad Med.* 2014;89:1245-51.  
41  
42  
43  
44 28. Kievit J, Krukerink M, Marang-van de Mheen PJ. Surgical adverse outcome reporting as part of  
45 routine clinical care. *Qual Saf Health Care.* 2010; doi:10.1136/qshc.2008.027458.  
46  
47  
48  
49 29. de Vos MS, Marang-van de Mheen PJ, Smith AD, Mou D, Whang EE, Hamming JF. Towards  
50 Best Practices for Surgical Morbidity & Mortality conferences: a mixed methods study. *J Surg*  
51 *Educ.* Forthcoming 2018; doi:10.1016/j.jsurg.2017.07.002  
52  
53  
54  
55 30. Braun V, Clarke V. Using thematic analysis in psychology. *Qual Res Psychol.* 2006;3:77-101.  
56  
57  
58  
59 31. Saldaña J. *The Coding Manual for Qualitative Researchers.* London, UK: SAGE Publications  
60

- 1  
2  
3 Ltd; 2009.  
4  
5  
6 32. de Vos MS, Smith AD, Shimizu N, Whang EE. Surgical Quality Improvement Book (chapter 5):  
7  
8 Morbidity and Mortality Conference: a Weekly Conference Designed to Improve Surgical  
9  
10 Quality.  
11  
12 [http://www.brighamandwomens.org/Departments\\_and\\_Services/surgery/qiChapter5.aspx?sub](http://www.brighamandwomens.org/Departments_and_Services/surgery/qiChapter5.aspx?sub=0)  
13  
14 [=0](http://www.brighamandwomens.org/Departments_and_Services/surgery/qiChapter5.aspx?sub=0) [accessed July 24, 2017]  
15  
16 33. Kwok ESH, Calder LA, Barlow-Krelina E, Mackie C, Seely AJE, Cwinn AA, et al.  
17  
18 Implementation of a structured hospital-wide morbidity and mortality rounds model. *BMJ Qual*  
19  
20 *Saf.* 2016; doi:10.1136/bmjqs-2016-005459.  
21  
22  
23 34. Kauffmann RM, Landman MP, Shelton J, Dmochowski RR, Bledsoe SH, Hickson GB, et al.  
24  
25 The Use of a Multidisciplinary Morbidity and Mortality Conference to Incorporate ACGME  
26  
27 General Competencies. *J Surg Educ.* 2011;68:303-8.  
28  
29  
30 35. Deis JN, Smith KM, Warren MD, Throop PG, Hickson GB, Joers BJ, et al. Transforming the  
31  
32 Morbidity and Mortality Conference into an Instrument for Systemwide Improvement (In:  
33  
34 *Advances in Patient Safety: New Directions and Alternative Approaches; Vol. 2: Culture and*  
35  
36 *Redesign*). <http://www.ncbi.nlm.nih.gov/pubmed/21249895> [accessed March 23, 2017].  
37  
38  
39 36. Dixon-Woods M, Leslie M, Tarrant C, Bion J, Shekelle P, et al. Explaining Matching Michigan:  
40  
41 an ethnographic study of a patient safety program. *Implement Sci.* 2013;8:70.  
42  
43  
44 37. Dixon-Woods M, McNicol S, Martin G. Ten challenges in improving quality in healthcare:  
45  
46 lessons from the Health Foundation's programme evaluations and relevant literature. *BMJ Qual*  
47  
48 *Saf.* 2012;21:876-84.  
49  
50  
51 38. Hamby LS, Birkmeyer JD, Birkmeyer C, Alksnitis JA, Ryder L, Dow R. Using Prospective  
52  
53 Outcomes Data to Improve Morbidity and Mortality Conferences. *Curr Surg.* 2000;57:384-88.  
54  
55  
56 39. Hutter MM, Rowell KS, Devaney LA, Sokal SM, Warshaw AL, Abbott WM, et al.  
57  
58 Identification of Surgical Complications and Deaths: An Assessment of the Traditional Surgical  
59  
60



- 1  
2  
3 Morbidity and Mortality Conference Compared with the American College of  
4 Surgeons-National Surgical Quality Improvement Program. *J Am Coll Surg.* 2006;203:618-24.  
5  
6  
7  
8 40. Martinez W, Lehmann LS, Hu Y-Y, Desai SP, Shapiro J. Processes for Identifying and  
9  
10 Reviewing Adverse Events and Near Misses at an Academic Medical Center. *Jt Comm J Qual*  
11  
12 *Patient Saf.* 2017;43:5-15.  
13  
14 41. Dekker S. *Just Culture: Restoring Trust and Accountability in Your Organization.* Taylor &  
15  
16 Francis Ltd; 2016.  
17  
18 42. Kuper A, Zur Nedden N, Etchells E, Shadowitz S, Reeves S. Teaching and learning in morbidity  
19  
20 and mortality rounds: an ethnographic study. *Med Educ.* 2010;44:559-69.  
21  
22  
23  
24  
25  
26  
27  
28  
29  
30  
31  
32  
33  
34  
35  
36  
37  
38  
39  
40  
41  
42  
43  
44  
45  
46  
47  
48  
49  
50  
51  
52  
53  
54  
55  
56  
57  
58  
59  
60

**Table 1.** Facilitators and barriers to successful M&M practice, grouped in themes and structured across levels of a framework for achieving change in healthcare.

| <i>Theme</i>                   | <i>Factor</i>                   | <i>Facilitator</i><br>(+) | <i>Barrier</i><br>(-) |
|--------------------------------|---------------------------------|---------------------------|-----------------------|
| <i>I) Case level</i>           |                                 |                           |                       |
| <b>Type of case (1)</b>        | Attractive topic                | +                         |                       |
|                                | Clinical relevance              | +                         |                       |
| <b>Information (2)</b>         | Value for education/improvement | +                         |                       |
|                                | Include local data              | +                         |                       |
|                                | Literature                      | +                         |                       |
|                                | Skills education                | +                         |                       |
|                                | Information from those involved | +                         | -                     |
| <b>Presentation (3)</b>        | Addressing system factors       | +                         |                       |
|                                | Addressing 'soft skills'        | +                         |                       |
|                                | Qualified presenter             | +                         |                       |
|                                | Proper preparation              | +                         |                       |
|                                | Proper supervision              | +                         |                       |
|                                | Fixed format                    | +                         |                       |
| <i>II) Action level</i>        |                                 |                           |                       |
| <b>Type of plan (4)</b>        | Attractive topic                | +                         |                       |
|                                | Clinically significant topic    | +                         |                       |
|                                | More disciplines involved       |                           | -                     |
| <b>Planning (5)</b>            | Higher complexity               |                           | -                     |
|                                | Explicitly formulated           | +                         |                       |
|                                | Responsibility assigned         | +                         | -                     |
|                                | Time frame determined           | +                         |                       |
|                                | Included in protocols           | +                         |                       |
| <i>III) Individual level</i>   |                                 |                           |                       |
| <b>Motivation (6)</b>          | Intrinsic motivation            | +                         |                       |
|                                | Interest in specific topic      | +                         |                       |
|                                | Values/beliefs                  | +                         | -                     |
|                                | Other priorities/incentives     |                           | -                     |
| <b>Participation (7)</b>       | Personality                     | +                         | -                     |
| <b>Realization (8)</b>         | Empowerment, control            | +                         |                       |
|                                | Forgetfulness                   |                           | -                     |
| <i>IV) Social level</i>        |                                 |                           |                       |
| <b>Culture (9)</b>             | Safe environment                | +                         |                       |
|                                | Team spirit                     | +                         | -                     |
|                                | Super specialization            |                           | -                     |
| <b>Leadership (10)</b>         | Reinforcing attendance          | +                         |                       |
|                                | Reinforcing actions             | +                         |                       |
|                                | Hierarchy                       | +                         | -                     |
| <b>Participants (11)</b>       | Exemplary behaviour             | +                         |                       |
|                                | Participation of experts        | +                         |                       |
|                                | Interactivity                   | +                         |                       |
|                                | Audience composition/size       | +                         | -                     |
| <b>Moderation (12)</b>         | Multidisciplinary participation | +                         | -                     |
|                                | Qualified moderator             | +                         |                       |
| <i>V) Organizational level</i> |                                 |                           |                       |
| <b>M&amp;M format (13)</b>     | Strong focus on improvement     | +                         |                       |
|                                | M&M in specialist setting       | +                         |                       |
|                                | Communications (before/after)   | +                         |                       |
|                                | Too many cases per meeting      |                           | -                     |
|                                | No tracking of actions          |                           | -                     |
|                                | No check/feedback on effect     |                           | -                     |

|    |                           |                                |   |
|----|---------------------------|--------------------------------|---|
| 1  |                           |                                |   |
| 2  |                           |                                |   |
| 3  | <b>Reporting (14)</b>     | System for data collection     | + |
| 4  |                           | Difficult access to data       | - |
| 5  |                           | Lack of feedback from data     | - |
| 6  | <b>Staff (15)</b>         | Dedicated staff/committee      | + |
| 7  |                           | Super specialization           | - |
| 8  |                           | Staff turnover                 | - |
| 9  |                           | Other/conflicting expectations | - |
| 10 | <b>Time (16)</b>          | Overall lack of time           | - |
| 11 |                           | Receiving dedicated time       | + |
| 12 | <i>VI) External level</i> |                                |   |
| 13 | <b>Healthcare (17)</b>    | Inevitability ('nature')       | - |
| 14 |                           | Benchmarking                   | + |
| 15 | <hr/>                     |                                |   |

M&M, Morbidity and Mortality conference.

**Box 1.** Mediating pathways for M&M-based learning and improving that are affected by reported facilitators and barriers.

| Mediating pathways for M&M-based learning & improvement                           |                                                                                                                                                                                                              |
|-----------------------------------------------------------------------------------|--------------------------------------------------------------------------------------------------------------------------------------------------------------------------------------------------------------|
|  | <p><b>INFORMATION</b> <i>(to know)</i><br/>                     i.e. complete/clear/accessible information, presentations, data/trends, communications, feedback, input/discussion, dissemination.</p>       |
|  | <p><b>MOTIVATION</b> <i>(to want)</i><br/>                     i.e. participant attendance, participation, experience, engagement, support, sense of urgency.</p>                                            |
|  | <p><b>REALIZATION</b> <i>(to can/do)</i><br/>                     i.e. ensure a clear objective and extensive plan, feasibility, empowerment for change, follow-up/tracking, (re)evaluation, sustaining.</p> |

M&M, Morbidity and Mortality conference.

Peer review only

1  
2  
3  
4  
5  
6  
7  
8  
9  
10  
11  
12  
13  
14  
15  
16  
17  
18  
19  
20  
21  
22  
23  
24  
25  
26  
27  
28  
29  
30  
31  
32  
33  
34  
35  
36  
37  
38  
39  
40  
41  
42  
43  
44  
45  
46  
47  
48  
49  
50  
51  
52  
53  
54  
55  
56  
57  
58  
59  
60

**Box 2.** Recommendations for successful M&M practice based on identified facilitators and barriers, and mediating pathways for M&M-based learning and improvement.<sup>1</sup>

| Recommendation                                                             | Further details (related themes in Table 1)                                                                                                                                                                          |
|----------------------------------------------------------------------------|----------------------------------------------------------------------------------------------------------------------------------------------------------------------------------------------------------------------|
| <b>1. URGENCY</b>                                                          |                                                                                                                                                                                                                      |
| Select topics relevant to the audience and demonstrate a sense of urgency. | Ensure topics are applicable to one's own practice, clinically significant and accompanied by a sense of urgency, e.g. by supporting presentations with (local) data on incidences and harm (1,4,13)                 |
| <b>2. INFORMATION</b>                                                      |                                                                                                                                                                                                                      |
| Maximize informativeness and attractiveness of presentations.              | Use well-prepared presenters, engagement of those involved in cases, and fixed presentation formats including case details, literature, local/benchmark data as well as system-level and soft/human factors (2,3,6). |
| <b>3. PLANNING</b>                                                         |                                                                                                                                                                                                                      |
| Be explicit in terms of action items and follow-up.                        | Determine who will do what, when, and how, with a plan for follow-up and re-evaluation (5,10,13).                                                                                                                    |
| <b>4. MOTIVATION</b>                                                       |                                                                                                                                                                                                                      |
| Motivate participants through interactivity and feedback.                  | Ensure that participants are motivated, e.g. by using moderators to promote interactivity and 'close the loop' on prior actions through evaluation and feedback (6,10-14).                                           |
| <b>5. ANTICIPATION</b>                                                     |                                                                                                                                                                                                                      |
| Consider feasibility of actions, and anticipate and counter problems.      | Anticipate and plan how to counter problems with realization and sustaining of actions, e.g. due to complexity, lack of empowerment or engagement of all staff involved, or staff turnover (4,7,10).                 |
| <b>6. INPUT</b>                                                            |                                                                                                                                                                                                                      |
| Draw upon collective expertise of participants.                            | Ensure presence and input from all involved in care processes, e.g. by actively inviting comments from experts, juniors or other disciplines (7,9-11).                                                               |
| <b>7. RECEPTIVITY</b>                                                      |                                                                                                                                                                                                                      |
| Cultivate an open mindset, receptive to all input and opportunities.       | Emphasize that input of all involved in care is essential and valued as such, and underline the need to be sensitive to 'weak signals' that may signal opportunities for improvement (7,9-13).                       |
| <b>8. SETTING</b>                                                          |                                                                                                                                                                                                                      |
| Consider M&M meetings in specialist settings.                              | In meetings on the subspecialty or multidisciplinary level ('integrated care'), participants may be more informed and in control as topics are more closely related to their daily practice (8,9,13,15).             |

**9. RESOURCES****Dedicate time and staff to M&M practice and ensuing plans for improvement.**

Consider blocking time for attendance but also preparation and realization of actions, and consider use of a dedicated committee or staff to implement plans that ensue from M&M (6,10,15).

**10. DATA****Dedicate time and staff to M&M practice and ensuing actions for improvement.**

Ensure that data collection and monitoring systems are accessible to allow assessment of local performance, benchmarking against others and re-evaluation of prior plans for improvement (14, 17).

<sup>1</sup> There is no hierarchical order in this list. Numbers How recommendations relate to earlier published frameworks for improvement in healthcare and to mediating pathways, is depicted in Appendix 3.

1  
2  
3 **Appendix 1.** Topic list for semi-structured interviews with attending surgeons and residents.  
4

5 Introduction

- 6 - Background and objectives  
7  
8 - Information about interview (anonymity, safe)  
9 - Information about participant: years of work experience at the department.  
10

11 Morbidity and Mortality conference (M&M)

- 12 - How do you feel about M&M? What do you value? What do you miss/would you like to change?  
13 - Do you consider M&M part of your profession (core business)?  
14 - What affects whether learning that occurs through M&M?  
15 - What affects whether improvement that occurs through M&M?  
16 - What is the role of the adverse event reporting system in this?  
17  
18

19 Other topics:

20 Case selection

21 Prompts:

- 22 - What criteria should be used to select cases for M&M and why?  
23 - Could a case of a different surgical subspecialty be of educational value?  
24

25 Presentation

26 Prompts:

- 27 - Who could best present the case and why? (senior vs junior; involved vs not)  
28 - Would a fixed presentation format be beneficial or limiting?  
29 - What information is essential to a successful M&M (e.g. local data)?  
30

31 Attendance

32 Prompts:

- 33 - To what extent do logistic factors, e.g. OR schedules, influence M&M attendance rates?  
34 - Would attendance rates benefit from mandatory attendance, e.g. with sign-in sheets,  
35 or from exemplary behaviour of staff?  
36 - How would personal beliefs or motivation influence attendance rates?  
37

38 Moderator

39 Prompts:

- 40 - Who could best moderate and how?  
41 - To what extent does the moderator influence success of M&M (e.g. environment)?  
42

43 Culture

44 Prompts:

- 45 - Is there an open environment, free of shame and blame? What illustrates/influences that?  
46 - If you're at another department how could you assess whether a blame-free culture is  
47 present?  
48 - Example: postoperative haemorrhage case presented at M&M, you've also been present  
49 in operating room and now remember you had doubts about haemostasis, would you mention  
50 that? What (potential) consequences would such a comment have?  
51

52 Plans for improvement

53 Prompts:

- 54 - What affects whether formulated plans of action are successfully implemented?  
55 - Are lessons explicitly formulated and documented? How would this affect implementation?  
56 - How are plans tracked for implementation? Who should be responsible for this?  
57  
58  
59  
60

**Appendix 2.** Facilitators and barriers for successful M&M at different levels for achieving change in healthcare with illustrative quotes.

| Theme                   | Facilitator (F) and/or barrier (B)    | Illustrative quote                                                                                                                                                                                                                                                                                                                                                                                               |
|-------------------------|---------------------------------------|------------------------------------------------------------------------------------------------------------------------------------------------------------------------------------------------------------------------------------------------------------------------------------------------------------------------------------------------------------------------------------------------------------------|
| <i>I) Case level</i>    |                                       |                                                                                                                                                                                                                                                                                                                                                                                                                  |
| Type of case            | Attractive topic (F)                  | 'Surgery (...) something technical, you can visualize, (...) makes it easier to remember and to disseminate it to others(...) It might be more, well, fun, to learn about something 'operative'. '(#8)                                                                                                                                                                                                           |
|                         | Clinical relevance (F)                | 'While some topics may be less interesting (...) pressure ulcers or hospital acquired pneumonia for example, these are still of clinical relevance.' (#1)                                                                                                                                                                                                                                                        |
|                         | Value for education/improvement(F)    | 'A preference to discuss recent cases makes that you select a severe haemorrhage case while that actually went very well all year. It's key to identify and select real targets for improvement.' (#5)                                                                                                                                                                                                           |
| Information             | Include local data (F)                | 'Especially if you review your own numbers, that would provide valuable insights.' (#3)<br>'(...) pneumonia, everyone will be like 'oh no, boring', but if you present a concise plan and numbers and those things, then, I think that'd be very nice, because that concerns everyone.' (#5)                                                                                                                     |
|                         | Literature (F)                        | 'Why do I have to see 6000 graphs? (...) Just use the conclusions of the best papers (#1)'<br>'Just a few relevant papers, somewhat related to your own patient population.' (#8)<br>'Everyone thinks 'Well, how's our performance? Where are we compared to the literature?' (#9)<br>'Nationally, globally, are we above or below the line?' (#11)                                                              |
|                         | Skills education (F)                  | 'The presentation needs to include the very technical things, regarding surgical techniques.' (#6)<br>'You just want to prevent those errors and that's purely technical I think.' (#10)                                                                                                                                                                                                                         |
|                         | Information from those involved (F+B) | F: 'If you've been involved, it's nice to present that case and the content benefits from it too.' (#9)<br>B: 'The disadvantage of being emotionally involved is that you're sort of biased. [And can that bias impede learning?] Well yes, I think, cause it's only part of the story, from someone who's emotionally involved (...) difficult to keep it factual when the message is already 'coloured'.' (#7) |
|                         | Addressing system factors (F)         | 'I think, if the focus of the conference would shift towards system-level improvement, one would be more inclined to offer their opinion (...) it would yield more input.' (#5)                                                                                                                                                                                                                                  |
|                         | Addressing 'soft skills' (F)          | 'That's where this conference should be about (...) because then you don't learn from each other about content knowledge, but behavioural aspects – something 'the department' still shares (#2)'<br>'we are humans (...) let's go back to the moment it happened: What did you forget? What were you doing? Were you busy? (#7)                                                                                 |
|                         | Qualified presenter (F)               | 'It requires a skilful presenter otherwise, the pitfall is that it becomes a dry enumeration of things, while it should be lively, it's particularly all about the discussion.' (#11)                                                                                                                                                                                                                            |
| Presentation            | Proper preparation (F)                | [What makes that it does result in concrete targets?] 'The level of preparation by all means.' (#1)                                                                                                                                                                                                                                                                                                              |
|                         | Proper supervision (F)                | 'As long as there's proper supervision. No, it's not about the presentation of course, it's about the well-thought construction of your story, all things sorted out and whether these are correct.' (#3)                                                                                                                                                                                                        |
|                         | Fixed format (F)                      | 'Yes I think that has benefits [a fixed format], it makes it easier to make, for residents, less time, and you don't provide them the space to stray off topic, that it'll get to lengthy.' (#4)                                                                                                                                                                                                                 |
| <i>II) Action level</i> |                                       |                                                                                                                                                                                                                                                                                                                                                                                                                  |
| Type of plan            | Attractive topic (F)                  | 'If it's about a thread that resorbs faster, we're all extremely eager to say: 'we should use that!' (...) while if it's about antibiotics I day more or less, it really doesn't interest anyone.' (#1)                                                                                                                                                                                                          |
|                         | Clinically significant topic (F)      | 'Patients might die (...) is life threatening, so then you've got an incentive to do something.' (#3)                                                                                                                                                                                                                                                                                                            |



|                              |                                                                |                                                                                                                                                                                                                                                                                                                                                                                                                                                                                                                                           |
|------------------------------|----------------------------------------------------------------|-------------------------------------------------------------------------------------------------------------------------------------------------------------------------------------------------------------------------------------------------------------------------------------------------------------------------------------------------------------------------------------------------------------------------------------------------------------------------------------------------------------------------------------------|
|                              | More disciplines involved (B)                                  | <i>'How many people in the organization are involved? Lessons [i.e. to improve future care] that involve thousands of stakeholders are more difficult than those you can realize on your own.'</i> (#4)                                                                                                                                                                                                                                                                                                                                   |
|                              | Higher complexity (B)                                          | <i>'Some things are technical, you can visualize them (...) a clear intervention, because you either do it or you don't – while others more greatly depend on multiple factors.'</i> (#8)                                                                                                                                                                                                                                                                                                                                                 |
| <b>Planning</b>              | Explicitly formulated (F)                                      | <i>'I think because, it is most interesting when you head home thinking 'Darn. I'll do that differently tomorrow'. (...) and preferably within 15 minutes. Short and concise'</i> (#11)                                                                                                                                                                                                                                                                                                                                                   |
|                              | Responsibility assigned (F+B)                                  | <i>F: 'It shouldn't be non-committal, you should really earmark people.'</i> (#11)<br><i>B: 'If you just send someone off like 'you go do that', that won't work, it has been proven.'</i> (#9)                                                                                                                                                                                                                                                                                                                                           |
|                              | Time frame determined (F)                                      | <i>'Give it a month and then: 'Well a month ago we've discussed this, what has been done?' Then you really trigger someone.'</i> (#5)<br><i>'We'll discuss this in 3 months and then we'll assess progress, did anything change?' - that way it's not so vague. It will be remembered and will definitely have a follow-up attached to it.'</i> (#9)                                                                                                                                                                                      |
|                              | Included in protocols (F)                                      | <i>'It's challenging to translate lessons learned into changes in protocols or policies, but once you've connected those, well yes, then you're really going to improve your quality.'</i> (#9)                                                                                                                                                                                                                                                                                                                                           |
| <i>III) Individual level</i> |                                                                |                                                                                                                                                                                                                                                                                                                                                                                                                                                                                                                                           |
| <b>Motivation</b>            | Intrinsic motivation for QI (F)                                | <i>'In part it's about your motivation for that, that you just want to, just want to improve. If you're like 'it will all work out', yes, well, then nothing will happen.'</i> (#1)                                                                                                                                                                                                                                                                                                                                                       |
|                              | Interest in specific topic (F) (applicable, interest, urgency) | <i>'(...) when it's personal, when it's applicable to your own work, then you learn from it (...) also when it involves your own surgical service then it suddenly becomes top priority.'</i> (#11)                                                                                                                                                                                                                                                                                                                                       |
|                              | Values/beliefs (F+B)                                           | <i>F: '(...) experienced as a chore, which in itself isn't bad (...) some things are chores, but just need to be done'</i> (#4)<br><i>B: 'If you consider your job to be solely about operating, then you're not interested (...)'</i> (#11)                                                                                                                                                                                                                                                                                              |
|                              | Other priorities/incentives (B)                                | <i>'[residents] don't do it [free up time for actions], because we rather do it in the evening to avoid missing surgeries, clinic or clinical.. that's the focus of our training, clinical practice'</i> (#7)                                                                                                                                                                                                                                                                                                                             |
| <b>Participation</b>         | Personality (F+B)                                              | <i>F: 'It has to do with the type you hire. If it's the timid, anxious – yes, well then little will be said. But if you hire people with a big mouth, you will hear a lot of talking but not a lot of content (...) I think, you should tell the juniors: listen, if you don't dare, then you shouldn't be here.'</i> (#2)<br><i>B: 'I think that [fear of speaking up] is in part related to personality, I want to avoid offending others, so that's something that has to do with me personally rather than the environment.'</i> (#7) |
| <b>Realization</b>           | Empowerment, control (F)                                       | <i>'If it's about knot X instead of Y, that's something we can execute, we understand that, we are in control for that, and thus we will do it. (...) Surgeons are particularly in control in the OR.'</i> (#7)<br><i>'No matter how hard I'd try if they [anaesthesia] won't do something then they don't want and I can't influence that; while if a certain thread has better outcomes, I can change that myself.'</i> (#9)                                                                                                            |
|                              | Forgetfulness (B)                                              | <i>'But we haven't done that [actions] yet. Just because other things receive priority and because you simply forget about it.'</i> (#8)                                                                                                                                                                                                                                                                                                                                                                                                  |
| <i>IV) Social level</i>      |                                                                |                                                                                                                                                                                                                                                                                                                                                                                                                                                                                                                                           |
| <b>Culture</b>               | Safe environment (F)                                           | <i>'There needs to be an open environment, non-judgmental, I think that is the crux of the matter, because otherwise you won't learn anything, people will put their foot down and get angry.'</i> (#9)                                                                                                                                                                                                                                                                                                                                   |
|                              | Team spirit (F+B)                                              | <i>F: 'They [subspecially] know what I'm worth and I know their capacities, which creates a safe environment [for speaking up].'</i> (#1)<br><i>B: 'It's considered 'not done' - to not support each other [in discussions] – it's disloyal.'</i> (#7)<br><i>'Backstabbing undermines team spirit and most people in surgery are team players (...) so you'll always behave in the interest</i>                                                                                                                                           |

|                         |                                       |                                                                                                                                                                                                                                                                                                                                                                                                                                                                                                                                 |
|-------------------------|---------------------------------------|---------------------------------------------------------------------------------------------------------------------------------------------------------------------------------------------------------------------------------------------------------------------------------------------------------------------------------------------------------------------------------------------------------------------------------------------------------------------------------------------------------------------------------|
|                         |                                       | <i>of the team.'</i> (#8)                                                                                                                                                                                                                                                                                                                                                                                                                                                                                                       |
|                         | Super specialization (B)              | <i>'It's not 'us surgeons' anymore, it's a totally different organization.'</i> (#2)                                                                                                                                                                                                                                                                                                                                                                                                                                            |
|                         | Reinforcing attendance (F)            | <i>'It sounds bland, but it works, someone who says angrily: 'You have to attend, I'm the boss.'</i> (#4)                                                                                                                                                                                                                                                                                                                                                                                                                       |
|                         | Reinforcing actions (F)               | <i>'It works to promote action (...) that you'll fulfil your commitments (...) when you fear that if you won't do it you will get a roasting.'</i> (#7)                                                                                                                                                                                                                                                                                                                                                                         |
| <b>Leadership</b>       | Hierarchy (F+B)                       | <i>F: 'It's [attendance behaviour] more due to hierarchy, e.g. if attending X is always there, you'd need a good reason to be absent when X is there. He's got more important stuff to do than you, so it's probably important then. I definitely think that works.'</i> (#3)<br><i>B: 'If you really want to promote free speech, then faculty should emphasize that hierarchy is put aside during such a meeting.'</i> (#7)                                                                                                   |
|                         | Exemplary behaviour (F)               | <i>'I think if you're a resident on a rotation and a faculty member will also be absent, they you'd think, well why would I go? Yes, it's a sort of exemplary role.'</i> (#1)                                                                                                                                                                                                                                                                                                                                                   |
|                         | Participation of experts (F)          | <i>'Input from someone with experience, more 'master level' in addition to trainees. (...) Yes, [someone involved in the case] with enough 'flight hours' to be able to evaluate it.'</i> (#1)<br><i>'It's about content experts. (...) Half of our faculty members don't even know how to prescribe medications with the hospital software, so they shouldn't say anything about that.'</i> (#2)                                                                                                                               |
|                         | Interactivity (F)                     | <i>'[moderators] can evoke discussion by asking stimulating questions giving people in the audience the opportunity to respond.'</i> (#12)                                                                                                                                                                                                                                                                                                                                                                                      |
| <b>Participants</b>     | Audience composition/size (F+B)       | <i>F: 'Some people are more receptive to critique than others.'</i> (#4)<br><i>'The conference benefits from high attendance rates.'</i> (#8)<br><i>B: 'Well that [courage to speak up] depends on who's present, their interests and whether you could damage people. (...) It's by all means safer to discuss things in a smaller group.'</i> (#1)<br><i>'I think in a smaller setting (...) less [plans] will 'get lost'. It's a disadvantage that you reach fewer people, but the advantage is that less is lost.'</i> (#3) |
|                         | Multidisciplinary participation (F+B) | <i>F: 'If a nurse was involved then she needs to be present too. (...) We could discuss interesting cases with other specialists (...) we can really learn a lot together.'</i> (#6)<br><i>B: 'For some, if, say, nurses and other people are present, you would perhaps be less inclined to tell your boss that something went not so well.'</i> (#5)                                                                                                                                                                          |
| <b>Moderation</b>       | Qualified moderator (F)               | <i>'The role of the moderator, who has an important role in lowering the barrier [to speaking up] and be inviting, to create an environment that allows that.'</i> (#1)                                                                                                                                                                                                                                                                                                                                                         |
| <i>IV) Social level</i> |                                       |                                                                                                                                                                                                                                                                                                                                                                                                                                                                                                                                 |
|                         | Strong focus on improvement (F)       | <i>'We should attribute more time to exploring how we're going to improve (...) this conference is meant to achieve improvement rather than to present the most exciting case of the month.'</i> (#5)                                                                                                                                                                                                                                                                                                                           |
| <b>M&amp;M format</b>   | M&M in specialist setting (F)         | <i>'For subspecialist themes, I think the output will be much better if you'd discuss those in a smaller group within the surgical service, there will be a much safer environment too.'</i> (#1)<br><i>'Like love. I'm in love with my service and I'd do everything to ensure things run smoothly'</i> (#6)<br><i>'If it concerns your division, then you're really motivated to get those [complication] numbers down, then it suddenly becomes top priority.'</i> (#11).                                                    |
|                         | Communications (before/after) (F)     | <i>'(...) to send out some sneak previews, that will motivate people to attend.'</i> (#8)<br><i>'If something derives from it, it'll be nice to know, but you'd have to keep the email short.'</i> (#5)                                                                                                                                                                                                                                                                                                                         |
|                         | Too many cases per meeting (B)        | <i>'You won't make it [to discuss many cases] and it takes up so much energy and time, that you might miss lessons to be learned from cases.'</i> (#8)                                                                                                                                                                                                                                                                                                                                                                          |
|                         | No tracking of actions (B)            | <i>'And then what? It [action] ends up in a folder or email or something, that's not working.'</i> (#3)                                                                                                                                                                                                                                                                                                                                                                                                                         |

|                          |                                             |                                                                                                                                                                                                                                                                                                                                                                                      |
|--------------------------|---------------------------------------------|--------------------------------------------------------------------------------------------------------------------------------------------------------------------------------------------------------------------------------------------------------------------------------------------------------------------------------------------------------------------------------------|
|                          |                                             | <i>'You'd have to check whether it was actually done. [Is it now?] No.'</i> (#12)                                                                                                                                                                                                                                                                                                    |
|                          | No check/feedback on effect (B)             | <i>'Did anything change? (...) Feedback needs to improve greatly, otherwise it's so useless.'</i> (#10)<br><i>'According to improvement cycles you need a check (...) also to see if it had the right effect.'</i> (#12)                                                                                                                                                             |
| <b>Reporting</b>         | System for routine AO reporting (F)         | <i>'You'd have to register otherwise you don't know what you're doing. It's a terrible task; I'm really bad at it. But yes, you have to, because you want to learn from your performance.'</i> (#5)                                                                                                                                                                                  |
|                          | Difficult access to data (B)                | <i>'[Omitted because] it's a lot of work to retrieve data or we don't really know it that well.'</i> (#12)                                                                                                                                                                                                                                                                           |
|                          | Lack of feedback from data (B)              | <i>'The feedback is lacking. If you (...) only infrequently hear about an adverse event, you don't apply it to yourself. (...) It's all about feedback! Register, feedback, show the real world.'</i> (#11)                                                                                                                                                                          |
| <b>Staff</b>             | Dedicated quality committee/group (F)       | <i>'(...) requires leadership to evoke actions at the right moments by saying 'OK now we have to do this and now that.' That requires a group within the department that stands for that.'</i> (#2).<br><i>'By embedding that [actions] in task forces because they'll put it on their agenda and have something to say about that topic, about quality.'</i> (#11)                  |
|                          | Super specialization (B)                    | <i>'It's difficult to find time to meet, because we all do different things. (...) We share the surgical department, but we don't share anything in terms of topics or daily practice.'</i> (#2)                                                                                                                                                                                     |
|                          | Staff turnover (B)                          | <i>'A hospital like this is run by temporarily staff, residents who rotate. You can't count on the collective memory, cause it disappears.'</i> (#3)<br><i>'Try to maintain such a thing! In the sense that, new people arrive constantly'</i> (#4)                                                                                                                                  |
|                          | Other/conflicting expectations of staff (B) | <i>'As long as we expect single individuals to fulfil all these requirements for clinical practice, research, training, leadership and management - we'll miss important moments. (...) that is the inhibiting factor! Too many tasks and too many different tasks.'</i> (#2)<br><i>'I find the work load on employees bizarre in certain cases. (...) It's just too much.'</i> (#3) |
| <b>Time</b>              | Overall lack of time (B)                    | <i>'All conferences.. apparently everyone is a lot busier than 10 years ago. There's no time.'</i> (#4)<br><i>'To do a good job [as presenter], takes a lot of time. I think that's the biggest bottleneck. I really think so, cause during working hours you just can't find the time for that.'</i> (#12)                                                                          |
|                          | Receiving dedicated time for QI (F)         | <i>'That [block OR time for M&amp;M] provides you the space. (...) Apparently it's what we need.'</i> (#9)<br><i>'If we decide, and acknowledge [the importance], then give half a day.. I think that we should organize it in such a way, that residents receive half a day to do these things. We'd have to.'</i> (#7)                                                             |
| <i>V) External level</i> |                                             |                                                                                                                                                                                                                                                                                                                                                                                      |
| <b>'Nature'</b>          | Inevitability of AOs (B)                    | <i>'Well.. whether you'd always learn from it.. in the sense that a year later they [AOs] will occur less often, I don't know. I think there's a certain lower limit you can't overcome.'</i> (#4)                                                                                                                                                                                   |
| <b>Other hospitals</b>   | Benchmarking (F)                            | <i>'It's nice to benchmark to the rest of the world. How often does this happen here and somewhere else.. what are renowned centres, what're there numbers (...) can make it very urgent.'</i> (#11)<br><i>'If we exceed the global or European incidence rates, then you'd have a need to assess that trend.'</i> (#6)                                                              |

QI, Quality Improvement. M&M, morbidity and mortality conference. AO, adverse outcome.

Appendix 3. Relation of published frameworks for improvement in healthcare to this study's model of mediating pathways and practical recommendations.

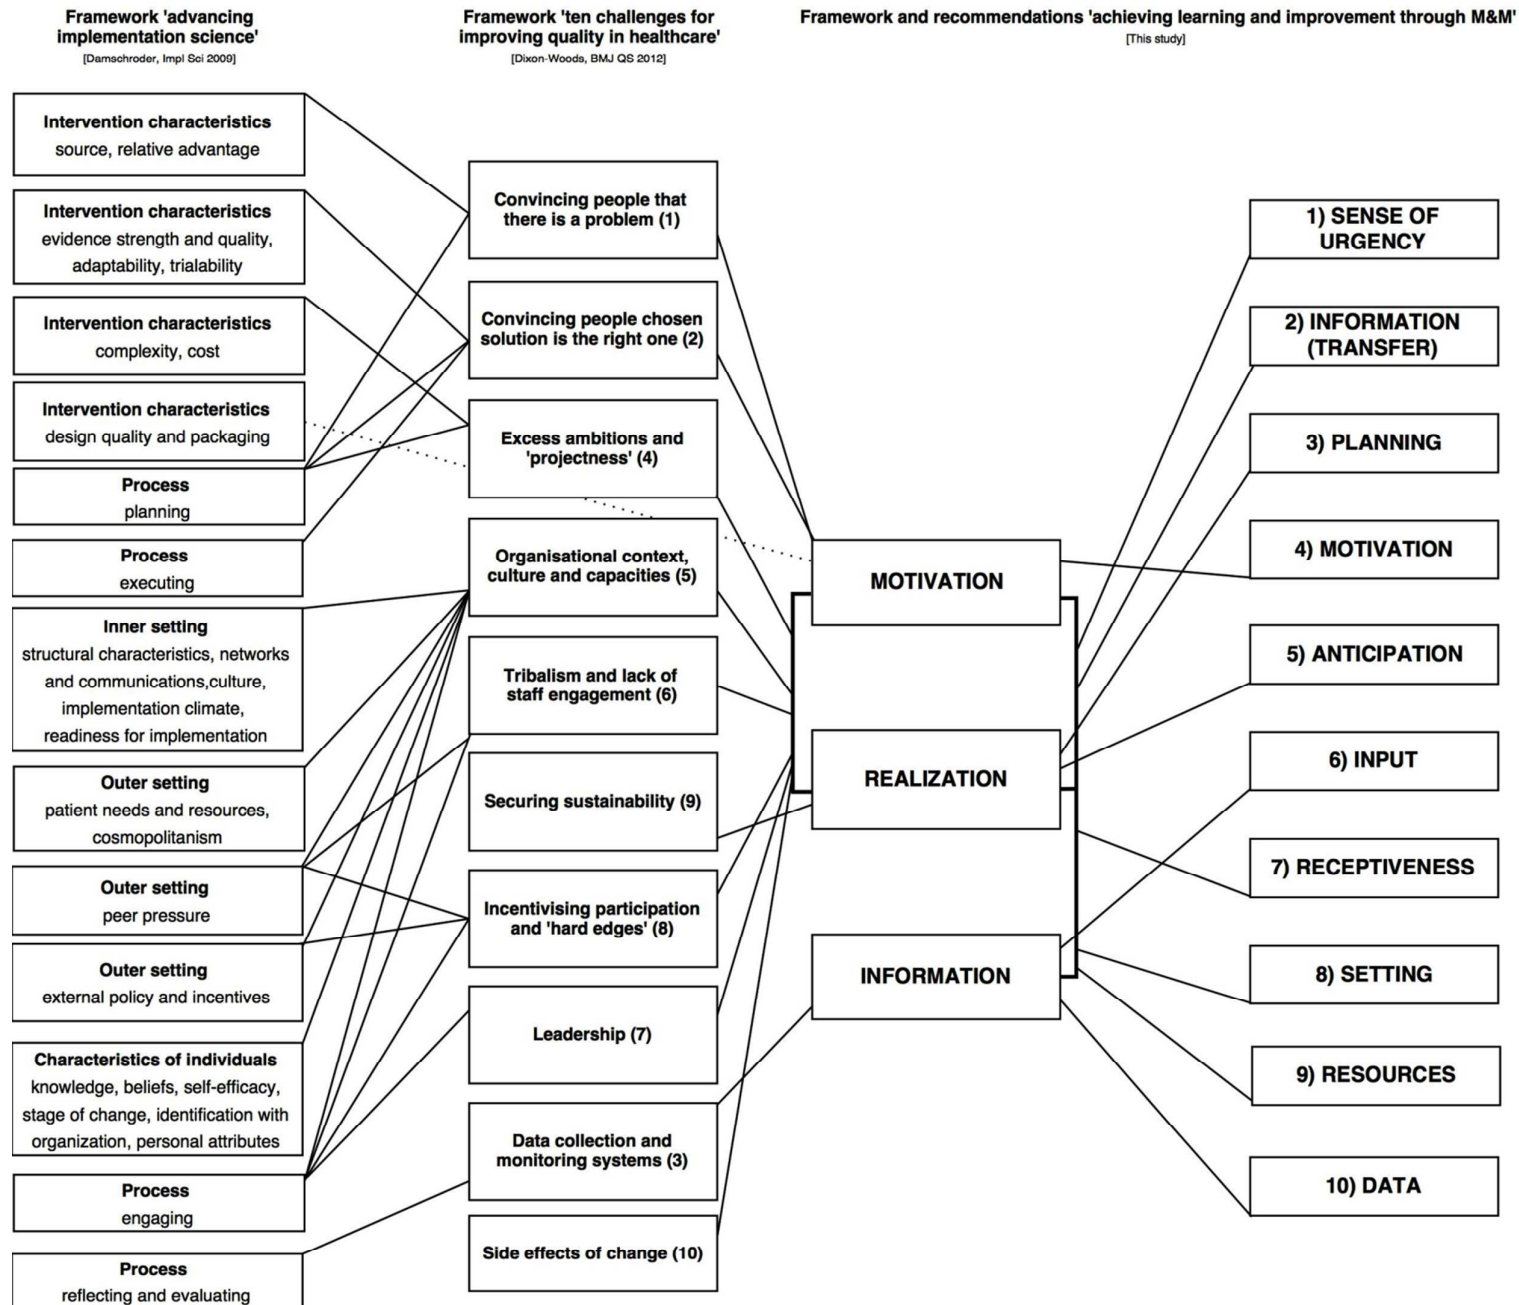

1  
2  
3  
4  
5  
6  
7  
8  
9  
10  
11  
12  
13  
14  
15  
16  
17  
18  
19  
20  
21  
22  
23  
24  
25  
26  
27  
28  
29  
30  
31  
32  
33  
34  
35  
36  
37  
38  
39  
40  
41  
42  
43  
44  
45  
46  
47  
48  
49

From left to right: ‘Consolidated Framework For Implementation Research’ (CFIR)<sup>1</sup>, framework from ‘Ten challenges for improving quality in healthcare’<sup>2</sup>, and this study’s pathways and recommendations for M&M. The relation between the first and second framework is depicted as described in the paper by Dixon-Woods et al.<sup>2</sup>

<sup>1</sup> Damschroder LJ, Aron DC, Keith RE, et al. Fostering implementation of health services research findings into practice: a consolidated framework for advancing implementation science. *Implement Sci.* 2009; doi:10.1186/1748-5908-4-50

<sup>2</sup> Dixon-Woods M, McNicol S, Martin G. Ten challenges in improving quality in healthcare: lessons from the Health Foundation’s programme evaluations and relevant literature. *BMJ Qual Saf.* 2012; doi:10.1136/bmjqs-2011-000760.

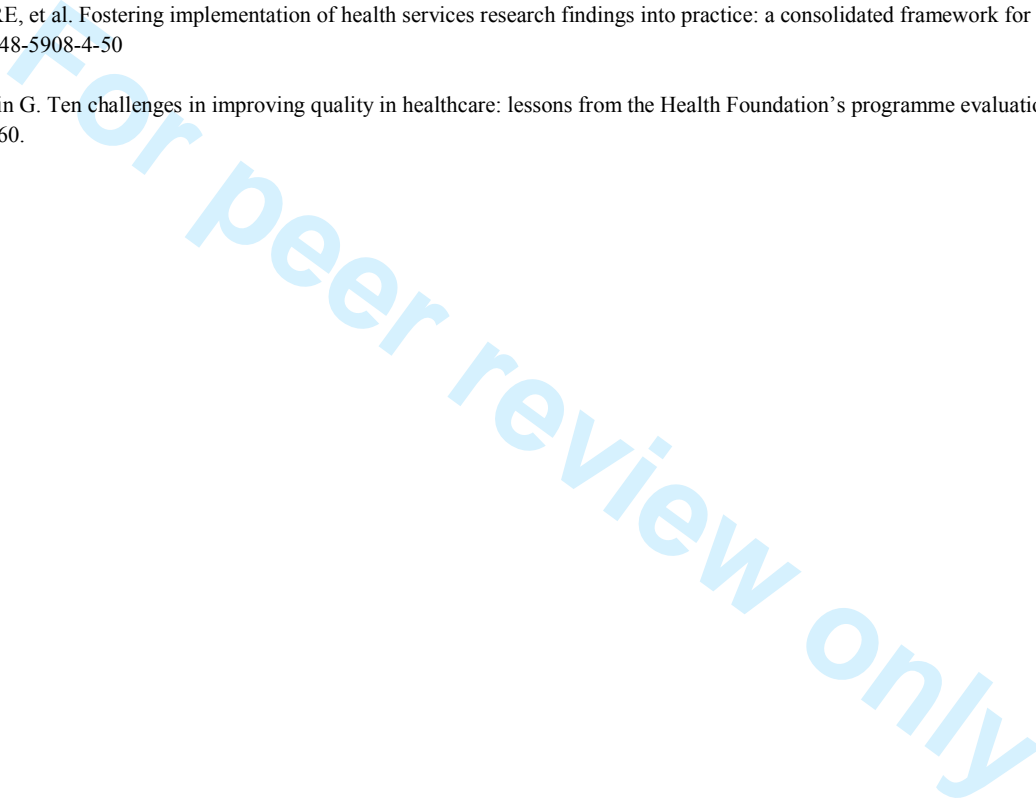

## COREQ (CONsolidated criteria for REporting Qualitative research) Checklist

A checklist of items that should be included in reports of qualitative research. You must report the page number in your manuscript where you consider each of the items listed in this checklist. If you have not included this information, either revise your manuscript accordingly before submitting or note N/A.

| Topic                                          | Item No. | Guide Questions/Description                                                                                                                              | Reported on Page No. |
|------------------------------------------------|----------|----------------------------------------------------------------------------------------------------------------------------------------------------------|----------------------|
| <b>Domain 1: Research team and reflexivity</b> |          |                                                                                                                                                          |                      |
| <i>Personal characteristics</i>                |          |                                                                                                                                                          |                      |
| Interviewer/facilitator                        | 1        | Which author/s conducted the interview or focus group?                                                                                                   |                      |
| Credentials                                    | 2        | What were the researcher's credentials? E.g. PhD, MD                                                                                                     |                      |
| Occupation                                     | 3        | What was their occupation at the time of the study?                                                                                                      |                      |
| Gender                                         | 4        | Was the researcher male or female?                                                                                                                       |                      |
| Experience and training                        | 5        | What experience or training did the researcher have?                                                                                                     |                      |
| <i>Relationship with participants</i>          |          |                                                                                                                                                          |                      |
| Relationship established                       | 6        | Was a relationship established prior to study commencement?                                                                                              |                      |
| Participant knowledge of the interviewer       | 7        | What did the participants know about the researcher? e.g. personal goals, reasons for doing the research                                                 |                      |
| Interviewer characteristics                    | 8        | What characteristics were reported about the interviewer/facilitator? e.g. Bias, assumptions, reasons and interests in the research topic                |                      |
| <b>Domain 2: Study design</b>                  |          |                                                                                                                                                          |                      |
| <i>Theoretical framework</i>                   |          |                                                                                                                                                          |                      |
| Methodological orientation and Theory          | 9        | What methodological orientation was stated to underpin the study? e.g. grounded theory, discourse analysis, ethnography, phenomenology, content analysis |                      |
| <i>Participant selection</i>                   |          |                                                                                                                                                          |                      |
| Sampling                                       | 10       | How were participants selected? e.g. purposive, convenience, consecutive, snowball                                                                       |                      |
| Method of approach                             | 11       | How were participants approached? e.g. face-to-face, telephone, mail, email                                                                              |                      |
| Sample size                                    | 12       | How many participants were in the study?                                                                                                                 |                      |
| Non-participation                              | 13       | How many people refused to participate or dropped out? Reasons?                                                                                          |                      |
| <i>Setting</i>                                 |          |                                                                                                                                                          |                      |
| Setting of data collection                     | 14       | Where was the data collected? e.g. home, clinic, workplace                                                                                               |                      |
| Presence of non-participants                   | 15       | Was anyone else present besides the participants and researchers?                                                                                        |                      |
| Description of sample                          | 16       | What are the important characteristics of the sample? e.g. demographic data, date                                                                        |                      |
| <i>Data collection</i>                         |          |                                                                                                                                                          |                      |
| Interview guide                                | 17       | Were questions, prompts, guides provided by the authors? Was it pilot tested?                                                                            |                      |
| Repeat interviews                              | 18       | Were repeat interviews carried out? If yes, how many?                                                                                                    |                      |
| Audio/visual recording                         | 19       | Did the research use audio or visual recording to collect the data?                                                                                      |                      |
| Field notes                                    | 20       | Were field notes made during and/or after the interview or focus group?                                                                                  |                      |
| Duration                                       | 21       | What was the duration of the interviews or focus group?                                                                                                  |                      |
| Data saturation                                | 22       | Was data saturation discussed?                                                                                                                           |                      |
| Transcripts returned                           | 23       | Were transcripts returned to participants for comment and/or                                                                                             |                      |



| Topic                                  | Item No. | Guide Questions/Description                                                                                                        | Reported on Page No. |
|----------------------------------------|----------|------------------------------------------------------------------------------------------------------------------------------------|----------------------|
|                                        |          | correction?                                                                                                                        |                      |
| <b>Domain 3: analysis and findings</b> |          |                                                                                                                                    |                      |
| <i>Data analysis</i>                   |          |                                                                                                                                    |                      |
| Number of data coders                  | 24       | How many data coders coded the data?                                                                                               |                      |
| Description of the coding tree         | 25       | Did authors provide a description of the coding tree?                                                                              |                      |
| Derivation of themes                   | 26       | Were themes identified in advance or derived from the data?                                                                        |                      |
| Software                               | 27       | What software, if applicable, was used to manage the data?                                                                         |                      |
| Participant checking                   | 28       | Did participants provide feedback on the findings?                                                                                 |                      |
| <i>Reporting</i>                       |          |                                                                                                                                    |                      |
| Quotations presented                   | 29       | Were participant quotations presented to illustrate the themes/findings?<br>Was each quotation identified? e.g. participant number |                      |
| Data and findings consistent           | 30       | Was there consistency between the data presented and the findings?                                                                 |                      |
| Clarity of major themes                | 31       | Were major themes clearly presented in the findings?                                                                               |                      |
| Clarity of minor themes                | 32       | Is there a description of diverse cases or discussion of minor themes?                                                             |                      |

Developed from: Tong A, Sainsbury P, Craig J. Consolidated criteria for reporting qualitative research (COREQ): a 32-item checklist for interviews and focus groups. *International Journal for Quality in Health Care*. 2007. Volume 19, Number 6: pp. 349 – 357

**Once you have completed this checklist, please save a copy and upload it as part of your submission. DO NOT include this checklist as part of the main manuscript document. It must be uploaded as a separate file.**

## Standards for Reporting Qualitative Research (SRQR)\*

<http://www.equator-network.org/reporting-guidelines/srqr/>

**Study title** *'Barriers and facilitators to learning and improving through morbidity and mortality conferences: a qualitative study'*

### Title and abstract

|                                                                                                                                                                                                                                                       | Page/line no(s). |
|-------------------------------------------------------------------------------------------------------------------------------------------------------------------------------------------------------------------------------------------------------|------------------|
| <b>Title</b> - Concise description of the nature and topic of the study Identifying the study as qualitative or indicating the approach (e.g., ethnography, grounded theory) or data collection methods (e.g., interview, focus group) is recommended | Title page       |
| <b>Abstract</b> - Summary of key elements of the study using the abstract format of the intended publication; typically includes background, purpose, methods, results, and conclusions                                                               | P1/3-25          |

### Introduction

|                                                                                                                                                              |              |
|--------------------------------------------------------------------------------------------------------------------------------------------------------------|--------------|
| <b>Problem formulation</b> - Description and significance of the problem/phenomenon studied; review of relevant theory and empirical work; problem statement | P3/11-19     |
| <b>Purpose or research question</b> - Purpose of the study and specific objectives or questions                                                              | P3/25;P4/1-2 |

### Methods

|                                                                                                                                                                                                                                                                                                                                                                                                      |                 |
|------------------------------------------------------------------------------------------------------------------------------------------------------------------------------------------------------------------------------------------------------------------------------------------------------------------------------------------------------------------------------------------------------|-----------------|
| <b>Qualitative approach and research paradigm</b> - Qualitative approach (e.g., ethnography, grounded theory, case study, phenomenology, narrative research) and guiding theory if appropriate; identifying the research paradigm (e.g., postpositivist, constructivist/interpretivist) is also recommended; rationale**                                                                             | P5/3-10; P6/7-9 |
| <b>Researcher characteristics and reflexivity</b> - Researchers' characteristics that may influence the research, including personal attributes, qualifications/experience, relationship with participants, assumptions, and/or presuppositions; potential or actual interaction between researchers' characteristics and the research questions, approach, methods, results, and/or transferability | P6/9-18         |
| <b>Context</b> - Setting/site and salient contextual factors; rationale**                                                                                                                                                                                                                                                                                                                            | P5/14-22        |
| <b>Sampling strategy</b> - How and why research participants, documents, or events were selected; criteria for deciding when no further sampling was necessary (e.g., sampling saturation); rationale**                                                                                                                                                                                              | P5/8-10         |
| <b>Ethical issues pertaining to human subjects</b> - Documentation of approval by an appropriate ethics review board and participant consent, or explanation for lack thereof; other confidentiality and data security issues                                                                                                                                                                        | P5/11-12        |
| <b>Data collection methods</b> - Types of data collected; details of data collection procedures including (as appropriate) start and stop dates of data collection and analysis, iterative process, triangulation of sources/methods, and modification of procedures in response to evolving study findings; rationale**                                                                             | P5/6-25         |



|                       |                                                                                                                                                                                                                                                       |                                           |
|-----------------------|-------------------------------------------------------------------------------------------------------------------------------------------------------------------------------------------------------------------------------------------------------|-------------------------------------------|
| 1<br>2<br>3<br>4<br>5 | <b>Data collection instruments and technologies</b> - Description of instruments (e.g., interview guides, questionnaires) and devices (e.g., audio recorders) used for data collection; if/how the instrument(s) changed over the course of the study | P5/24- P6/4;<br>P6/7;16-20.<br>Appendix 1 |
| 6<br>7<br>8<br>9      | <b>Units of study</b> - Number and relevant characteristics of participants, documents, or events included in the study; level of participation (could be reported in results)                                                                        | P5/14-18                                  |
| 10<br>11<br>12<br>13  | <b>Data processing</b> - Methods for processing data prior to and during analysis, including transcription, data entry, data management and security, verification of data integrity, data coding, and anonymization/de-identification of excerpts    | P6/6-8                                    |
| 14<br>15<br>16<br>17  | <b>Data analysis</b> - Process by which inferences, themes, etc., were identified and developed, including the researchers involved in data analysis; usually references a specific paradigm or approach; rationale**                                 | P6/9-25                                   |
| 18<br>19<br>20<br>21  | <b>Techniques to enhance trustworthiness</b> - Techniques to enhance trustworthiness and credibility of data analysis (e.g., member checking, audit trail, triangulation); rationale**                                                                | P6/13-16                                  |

### Results/findings

|                                  |                                                                                                                                                                                                   |                                            |
|----------------------------------|---------------------------------------------------------------------------------------------------------------------------------------------------------------------------------------------------|--------------------------------------------|
| 22<br>23<br>24<br>25<br>26<br>27 | <b>Synthesis and interpretation</b> - Main findings (e.g., interpretations, inferences, and themes); might include development of a theory or model, or integration with prior research or theory | P7-12;<br>table 1; box 1<br>appendix 3     |
| 28<br>29<br>30<br>31             | <b>Links to empirical data</b> - Evidence (e.g., quotes, field notes, text excerpts, photographs) to substantiate analytic findings                                                               | Quotes on P7-12;<br>table 1;<br>appendix 2 |

### Discussion

|                                              |                                                                                                                                                                                                                                                                                                                                                                                                             |                       |
|----------------------------------------------|-------------------------------------------------------------------------------------------------------------------------------------------------------------------------------------------------------------------------------------------------------------------------------------------------------------------------------------------------------------------------------------------------------------|-----------------------|
| 32<br>33<br>34<br>35<br>36<br>37<br>38<br>39 | <b>Integration with prior work, implications, transferability, and contribution(s) to the field</b> - Short summary of main findings; explanation of how findings and conclusions connect to, support, elaborate on, or challenge conclusions of earlier scholarship; discussion of scope of application/generalizability; identification of unique contribution(s) to scholarship in a discipline or field | P13-16;<br>appendix 2 |
| 40<br>41                                     | <b>Limitations</b> - Trustworthiness and limitations of findings                                                                                                                                                                                                                                                                                                                                            | P12/16-25             |

### Other

|                            |                                                                                                                                               |     |
|----------------------------|-----------------------------------------------------------------------------------------------------------------------------------------------|-----|
| 42<br>43<br>44<br>45<br>46 | <b>Conflicts of interest</b> - Potential sources of influence or perceived influence on study conduct and conclusions; how these were managed | P17 |
| 47<br>48<br>49             | <b>Funding</b> - Sources of funding and other support; role of funders in data collection, interpretation, and reporting                      | P17 |

1  
2  
3  
4  
5  
6  
7 \*The authors created the SRQR by searching the literature to identify guidelines, reporting standards, and critical  
8 appraisal criteria for qualitative research; reviewing the reference lists of retrieved sources; and contacting experts  
9 to gain feedback. The SRQR aims to improve the transparency of all aspects of qualitative research by providing  
10 clear standards for reporting qualitative research.

11 \*\*The rationale should briefly discuss the justification for choosing that theory, approach, method, or technique  
12 rather than other options available, the assumptions and limitations implicit in those choices, and how those choices  
13 influence study conclusions and transferability. As appropriate, the rationale for several items might be discussed  
14 together.

15  
16  
17  
18  
19  
20 **Reference:**

21 O'Brien BC, Harris IB, Beckman TJ, Reed DA, Cook DA. **Standards for reporting qualitative research: a**  
22 **synthesis of recommendations.** *Academic Medicine*, Vol. 89, No. 9 / Sept 2014  
23 DOI: 10.1097/ACM.0000000000000388  
24  
25  
26  
27  
28  
29  
30  
31  
32  
33  
34  
35  
36  
37  
38  
39  
40  
41  
42  
43  
44  
45  
46  
47  
48  
49  
50  
51  
52  
53  
54  
55  
56  
57  
58  
59  
60

# BMJ Open

## Barriers and facilitators to learn and improve through morbidity and mortality conferences: a qualitative study

|                                 |                                                                                                                                                                                   |
|---------------------------------|-----------------------------------------------------------------------------------------------------------------------------------------------------------------------------------|
| Journal:                        | <i>BMJ Open</i>                                                                                                                                                                   |
| Manuscript ID                   | bmjopen-2017-018833.R1                                                                                                                                                            |
| Article Type:                   | Research                                                                                                                                                                          |
| Date Submitted by the Author:   | 06-Sep-2017                                                                                                                                                                       |
| Complete List of Authors:       | de Vos, Marit S.; Leids Universitair Medisch Centrum, Hamming, Jaap; LUMC, surgery<br>Marang-van de Mheen, Perla; Leiden University Medical Centre, Medical Decision Making, J10S |
| <b>Primary Subject Heading</b>: | Medical education and training                                                                                                                                                    |
| Secondary Subject Heading:      | Qualitative research, Health services research, Surgery                                                                                                                           |
| Keywords:                       | morbidity and mortality conferences, quality improvement, patient safety, continuing education, barriers and facilitators, professionals                                          |
|                                 |                                                                                                                                                                                   |

SCHOLARONE™  
Manuscripts

Peer Review Only

# Barriers and facilitators to learn and improve through morbidity and mortality conferences: a qualitative study

Marit S. de Vos, MD,<sup>1,2</sup> Jaap F. Hamming, MD, PhD,<sup>1</sup> Perla J. Marang-van de Mheen, PhD<sup>2</sup>

<sup>1</sup> Department of Surgery, <sup>2</sup> Department of Medical Decision Making,  
Leiden University Medical Centre  
*Leiden, the Netherlands*

Address for correspondence:

Marit S. de Vos  
Department of Surgery  
Zone K6-R  
Leiden University Medical Centre  
Albinusdreef 2  
2333 ZA Leiden, the Netherlands  
[m.s.de\\_vos@lumc.nl](mailto:m.s.de_vos@lumc.nl)  
+31 71 529 8529

**Key words:** morbidity and mortality conferences; quality improvement; patient safety; continuing education; barriers and facilitators; professionals; providers.

1  
2  
3 **1 ABSTRACT**  
4  
5  
6

7

8 **Objectives:** To explore barriers and facilitators to successful morbidity and mortality

9 conferences (M&M), driving learning and improvement.  
10  
11

12

13  
14 **Design:** Qualitative study with semi-structured interviews. Inductive, thematic content

15 analysis was used to identify barriers and facilitators, which were structured across a

16 pre-existing framework for change in healthcare.  
17  
18  
19

20

21 **Setting:** Dutch academic surgical department with a long tradition of M&M.  
22  
23

24

25 **Participants:** An interview sample of surgeons, residents and physician assistants (n=12).  
26  
27

28

29 **Results:** A total of 57 barriers and facilitators to successful M&M, covering 18 themes,  
30  
31

32 varying from 'case type' to 'leadership', were perceived by surgical staff. While some factors

33 related to M&M organization, others concerned individual or social aspects. Eight factors, of

34 which four were at the social level, had simultaneous positive and negative effects

35 (e.g. 'hierarchy' and 'team spirit'). Mediating pathways for M&M success were found to relate

36 to available *information*; staff *motivation*; and *realization* processes.  
37  
38  
39

40

41 **Conclusions:** This study provides leads for improvement of M&M practice, as well as for

42 further research on key elements of successful M&M. Various factors were perceived to affect

43 M&M success, of which many were individual and social rather than organizational factors,  
44  
45

46 affecting information and realization processes but also staff motivation. Based on these  
47  
48  
49  
50  
51  
52  
53  
54  
55  
56  
57  
58  
59  
60

1  
2  
3  
4  
5  
6  
7  
8  
9  
10  
11  
12  
13  
14  
15  
16  
17  
18  
19  
20  
21  
22  
23  
24  
25  
26  
27  
28  
29  
30  
31  
32  
33  
34  
35  
36  
37  
38  
39  
40  
41  
42  
43  
44  
45  
46  
47  
48  
49  
50  
51  
52  
53  
54  
55  
56  
57  
58  
59  
60

- 1 findings, practical recommendations were formulated to guide efforts towards best practices
- 2 for M&M.

For peer review only

### Strengths and limitations of this study

- This is the first qualitative study to assess success factors of morbidity and mortality conferences.
- Strengths of this study design include the use of purposive sampling and data saturation to obtain a diversity of viewpoints and increase the ability to identify all relevant factors.
- Because of the single centre design, some findings may particularly be representative of teaching hospitals and surgical specialties.

## 1 INTRODUCTION

2  
3 The morbidity and mortality conference (M&M) is a deep-rooted tradition in surgery, adopted  
4 by many other medical specialties, aiming to serve both educational and quality improvement  
5 (QI) purposes.<sup>1,2</sup> M&M additionally provides opportunities to teach principles of patient safety  
6 and QI, which are current requirements for residency education.<sup>3-5</sup> Despite similar objectives,  
7 significant variation exists in M&M practice.<sup>1,3</sup> Case presentations and discussions may  
8 highlight important learning points, but implementation and follow-up often receive less  
9 attention at the conference, which is a known challenge for many improvement practices in  
10 health care.<sup>5-9</sup>

11  
12 M&M practice variation is likely related to the fact that key factors for successful M&M,  
13 driving learning and improvement, remain largely unclear. Factors that have been reported  
14 include organizational aspects, such as a structured approach to review events,<sup>10,11</sup> using  
15 moderators,<sup>2,12-14</sup> and participation of all involved staff,<sup>10,15,16</sup> which were corroborated by  
16 survey studies.<sup>3,17-20</sup> Except for the importance of a safe, blame-free environment,<sup>2,12</sup> the  
17 impact of non-organizational factors, such as team dynamics, has not been considered. While  
18 learning and change theories stipulate that these processes occur at different levels, affected by  
19 various factors at the individual and team level,<sup>21-24</sup> it remains unknown to what extent these  
20 factors effect learning and improving processes at M&M.

21  
22 We hypothesized that barriers and facilitators to successful M&M, resulting in learning and  
23 improvement, also exist at the individual or social level. To obtain a broad and nuanced  
24 understanding of the complexity of factors influencing M&M success, a qualitative approach  
25 was used. Qualitative studies have rarely been used to study M&M, but can yield rich insights



1  
2  
3 1 that may not be revealed by quantitative assessments. The purpose of this study was to enhance  
4  
5 2 understanding of the barriers, facilitators and mediating pathways to successful M&M, driving  
6  
7 3 learning, and improvement of clinical practice.  
8  
9  
10  
11  
12  
13  
14  
15  
16  
17  
18  
19  
20  
21  
22  
23  
24  
25  
26  
27  
28  
29  
30  
31  
32  
33  
34  
35  
36  
37  
38  
39  
40  
41  
42  
43  
44  
45  
46  
47  
48  
49  
50  
51  
52  
53  
54  
55  
56  
57  
58  
59  
60

1  
2  
3 **1 METHODS**  
4  
5  
6  
7  
8  
9  
10  
11  
12  
13  
14  
15  
16  
17  
18  
19  
20  
21  
22  
23  
24  
25  
26  
27  
28  
29  
30  
31  
32  
33  
34  
35  
36  
37  
38  
39  
40  
41  
42  
43  
44  
45  
46  
47  
48  
49  
50  
51  
52  
53  
54  
55  
56  
57  
58  
59  
60

2  
3 A total of 12 semi-structured one-hour interviews were conducted to identify barriers and  
4 facilitators for successful M&M. This qualitative approach was chosen as it allows exploring  
5 perceptions, and encourages participants to share rich descriptions and in-depth information.<sup>25</sup>

6 The number of 12 interviews was selected because of feasibility and anticipated number  
7 needed to reach data saturation, defined as three consecutive interviews without additional  
8 themes emerging.<sup>26</sup> Purposive sampling was used to invite participants via telephone or email -  
9 varying gender, seniority and surgical subspecialty - to obtain a diversity of viewpoints and  
10 hence increase the ability to identify all relevant barriers and facilitators. Standards for  
11 reporting qualitative research were used to guide reporting of this study.<sup>27</sup> Ethical approval for  
12 this type of study was not required under Dutch national law.

13  
14 All invited agreed to participate, including 6 attending surgeons, 5 surgical residents and 1  
15 physician assistant (PA) (4 females; mean local work experience: 7.2 years [range 1-18 years]).

16 All worked at the surgical department of a large academic hospital in the Netherlands (882  
17 beds), covering general, endocrine, vascular, gastrointestinal, paediatric, oncologic, trauma  
18 and transplant surgery (all represented in the interview sample). All interviewees had prior  
19 experience with M&M practice at other, mostly teaching, hospitals. The department has a long  
20 tradition of departmental M&M meetings, which gather all faculty, residents, physician  
21 assistants and medical students to discuss a single case during a one-hour conference every two  
22 weeks. More details on the local M&M format can be found in prior publications.<sup>28,29</sup> Cases are  
23 selected and presented by residents under faculty supervision (i.e. regardless of their  
24 involvement). A single case is presented per meeting with the aid of fixed presentation formats,  
25 which is followed by a 20-40 minute discussion led by a moderator.<sup>29</sup>

1  
2  
3 1  
4  
5 2 Prior to the interview, participants were informed about the study objectives and design.  
6  
7 3 Identity of interviewees was kept anonymous to both colleagues and department chiefs to  
8  
9  
10 4 protect confidentiality and promote openness. A topic guide was developed to guide the  
11  
12 5 interviews (Appendix 1). First, participants were asked about their overall opinion on M&M  
13  
14 6 practice, and what factors may affect M&M success, defined as a conference that results in  
15  
16 7 learning and improvement. This broad definition was intentionally selected to allow  
17  
18 8 interviewees to freely explore what makes a successful M&M. Interviewees were encouraged  
19  
20 9 to discuss experiences with M&M in both the local and other hospitals (e.g. due to hospital  
21  
22 10 rotation during residency), as well as factors that they expected but never experienced. Further  
23  
24 11 questions related to the perceived effect of factors that are most common in the M&M  
25  
26 12 literature, related to the conference's structure (i.e. attendance, culture) and content (i.e. case  
27  
28 13 selection, presentation, moderation, deriving plans).<sup>3,29</sup> Questions about experiences with the  
29  
30 14 local M&M were used to evoke discussion of generic success factors and barriers (e.g. what  
31  
32 15 illustrates that your M&M is [not] free of shame and blame?)  
33  
34  
35  
36 16  
37  
38 17 Each interviewee was interviewed individually in a conference room of a research department  
39  
40 18 in the hospital. Interviews were audiotaped and transcribed in full. Anonymized transcripts  
41  
42 19 were analysed using thematic content analysis with an inductive, data-driven approach, which  
43  
44 20 involved a recursive process of open coding and collocating codes into themes.<sup>30,31</sup> Coding was  
45  
46 21 performed in ATLAS.ti software (GmbH, Berlin, Germany) by the same researcher who  
47  
48 22 individually conducted the interviews (MdV). This researcher has an MD degree and  
49  
50 23 experience in research on M&M,<sup>29,32</sup> but no professional relationship with interviewees as she  
51  
52 24 is currently not involved in clinical work. A second coder, who was a research assistant with  
53  
54 25 qualitative research experience, independently reviewed all coded transcripts for continuity of  
55  
56  
57  
58  
59  
60

1  
2  
3 1 data interpretation and any miscoded statements, and discussed with the primary coder until  
4  
5 2 consensus was reached. To guide the analysis, emerging themes were structured across six  
6  
7 3 domains of a pre-existing framework for barriers to and incentives for change in healthcare,  
8  
9 4 developed based on various theories and models for implementing change.<sup>22</sup> Domains  
10  
11 5 included: case (adapted from ‘patient’); action (adapted from ‘innovation’); individual  
12  
13 6 professional; social context; organizational context; and external context. Frequencies of  
14  
15 7 reported factors were only reported when notably high, low or different between residents and  
16  
17 8 faculty. Factors were assessed for their direction of effect (i.e. facilitator, barrier or both) and  
18  
19 9 their pathways to achieve a successful M&M (i.e. how exactly does this enhance M&M-based  
20  
21 10 learning and improvement?). The mediating pathways for M&M success identified in this  
22  
23 11 study were subsequently assessed for their relation to existing, more general frameworks for  
24  
25 12 improvement in healthcare.<sup>22</sup>  
26  
27  
28  
29  
30  
31  
32  
33  
34  
35  
36  
37  
38  
39  
40  
41  
42  
43  
44  
45  
46  
47  
48  
49  
50  
51  
52  
53  
54  
55  
56  
57  
58  
59  
60

## 1 RESULTS

2  
3  
4  
5  
6  
7 A total of 57 facilitators and barriers for M&M success were reported by interviewed  
8 professionals (Table 1). All were reported in at least three interviews, and data saturation was  
9 reached at the 10th interview. More facilitators than barriers were reported, with most  
10 facilitators at the case level, and most barriers at the organizational level. Many facilitators  
11 could also serve as a barrier if absent or insufficient (e.g. motivation), but for eight factors, of  
12 which four were at the social level, both positive and negative effects were perceived  
13 simultaneously (e.g. hierarchy) (Table 1). Illustrative quotes for all facilitators and barriers are  
14 provided in Appendix 2. Facilitators and barriers were grouped into 17 themes, which will be  
15 discussed per level of the framework for change in healthcare (Table 1).  
16  
17  
18  
19  
20  
21  
22  
23  
24  
25  
26  
27  
28

### 29 Case/action level

30  
31 The type of case discussed at M&M as well as the type of action items, were reported as  
32 influencing factors. Cases and actions dealing with clinically relevant and attractive topics (i.e.  
33 high severity/frequency and surgical technical issues) were perceived to increase sense of  
34 urgency to bring about change (Table 1). (*We like that [surgical technique]. We're all very*  
35 *practical people.* [#7]).  
36  
37  
38  
39  
40  
41  
42

43 To enhance information transfer, presenters should be skilful, well-prepared and  
44 supervised, using fixed presentation formats to cover the case, pertinent literature, surgical  
45 skills and involved system-level factors. M&M was also seen as an important opportunity to  
46 address soft skills, such as communication or emotional impact. Including local data and trends  
47 was perceived to instigate reflection and increase the sense of urgency (*(...) about pneumonia,*  
48 *everyone will be like 'oh no, boring', but if you present a concise plan and numbers and those*  
49 *things, then, I think that'd be very nice, because that concerns everyone.* [#5]). Details  
50  
51  
52  
53  
54  
55  
56  
57  
58  
59  
60

1  
2  
3 1 regarding context and deliberations in cases should be obtained from those involved, but some  
4  
5 2 residents added that (emotional) involvement might also bias judgment and hinder information  
6  
7 3 accuracy.  
8

9  
10 4 Overall complexity of proposed actions was perceived as a barrier to implementation  
11  
12 5 and considered to increase with the number of people or disciplines involved. Hence plans  
13  
14 6 should be explicit, including a timeline and person in charge. At the same time, however,  
15  
16 7 top-down task assignment could hinder implementation, referred to as ‘mandatory  
17  
18 8 volunteerism’ (*‘If you just send someone off like ‘you go do that’, that won’t work, it has been*  
19  
20 9 *proven.’* [#9]).  
21  
22

23 10

### 24 11 **Individual level**

25  
26  
27 12 In various ways, professionals perceived ‘motivation’ as a powerful and important facilitator  
28  
29 13 for M&M, enhancing attendance rates, active participation, and subsequent realization of  
30  
31 14 actions (Table 1). Motivation was considered to improve when M&M covered topics  
32  
33 15 applicable to one’s own practice or field of interest, or when topics were accompanied by a  
34  
35 16 sense of urgency.  
36  
37

38  
39 17 Individual personalities were mentioned as potential facilitators as well as barriers, as  
40  
41 18 for example insecurity may hamper speaking up, while other personality traits could be  
42  
43 19 beneficial in that respect. Similarly, personal values and beliefs could enhance or impede  
44  
45 20 motivation to attend, participate and carry out actions. Feedback on actions from prior  
46  
47 21 conferences was considered essential to demonstrate the value of M&M (*‘Did anything*  
48  
49 22 *change? (...) Feedback needs to improve greatly, otherwise it’s so useless.’* [#10]).  
50  
51

52 23 A barrier was perceived in that staff may prioritize other activities over M&M, such as  
53  
54 24 clinical work or training duties (mostly mentioned by residents) or subspecialty-related  
55  
56 25 activities (mostly mentioned by faculty) (*‘I’m particularly interested in my own service [i.e.*  
57  
58  
59  
60

1 subspecialty], those are my patients and my trainees.' [#6]). Some noted that it should be  
2 prevented that M&M is considered a 'chore' as this decreases motivation, but others  
3 considered such 'chores' components of professionalism ('(...) some things are chores, but just  
4 need to be done.' [#4]).

## 6 Social level

7 The need for a safe environment to allow for an open discussion was often expressed (Table 1).  
8 In this respect, a strong sense of team spirit was considered beneficial (e.g. counting on support  
9 from peers), but also a potential barrier as one may withhold comments to avoid offending a  
10 colleague, referred to as 'back-stabbing' (Appendix 2). Super specialization in surgery was  
11 mentioned by all but one interviewee, and considered to have negatively affected team spirit,  
12 decreasing interest and motivation for topics outside one's subspecialty ('If you talk about  
13 pseudarthrosis, I'm sure no gastro-intestinal or vascular guy really enjoys it.' [#5]). Some  
14 suggested that M&M could therefore cover more general topics or increasingly focus on more  
15 general aspects, such as communication skills or teamwork involved, as these are shared  
16 among different subspecialties.

17 Leadership was assigned a critical role in harnessing this desired culture through  
18 exemplary behaviour and actively lowering barriers to speaking up ('It helps to see that things  
19 at times go wrong even for someone you perhaps admire, some expert.' [#11]). Some believed  
20 that faculty attendance may set an example to juniors, but others believed that mandatory  
21 attendance should be actively reinforced with staff held accountable for absences. All stressed  
22 that leadership should check and reinforce progress of M&M-derived actions, and that  
23 hierarchy helps in this respect. At the same time, hierarchy may serve as a barrier to an open  
24 discussion ('If you really want to promote free speech, then faculty should emphasize that  
25 hierarchy is put aside during such a conference.' [#7]). To steer discussions, promoting a safe

1 atmosphere, the use of moderators was considered helpful.

2 While high attendance rates may serve as a motivator and increase available  
3 information and reach, a smaller audience size may better promote a safe and open  
4 environment. Similarly, audience composition (i.e. who is present) can both positively and  
5 negatively affect the discussion (*'You really think about who is involved and try to predict how  
6 that person will respond. In some cases, you'll decide: well, I'm not going to do that  
7 here.'* [#3]). Specifically, it was considered important to increase interactivity and involve  
8 experts or staff who had been involved in the cases, to enhance discussion quality and  
9 participant experience. Multidisciplinary participation was considered to provide essential  
10 information, but also to potentially negatively affect openness and level of discussions (*'Well  
11 then there might be some competence differences. Perhaps for some topics it could work, but  
12 not in general I'd say.'* [#9]).

#### 14 **Organizational/external level**

15 With regards to the M&M format, a strong focus on improvement, and (preceding)  
16 communications were considered beneficial. Handling too many cases was mentioned as a  
17 potential barrier, as it may decrease attention and time for discussing opportunities for  
18 improvement (Table 1). With regards to the setting, most faculty (4/6) advocated for  
19 subspecialty rather than departmental M&M, as it would allow discussions to focus on  
20 subspecialist topics, which would increase participants' motivation and ability to change  
21 processes at their own ward. Moreover, super specialization may currently limit one's ability to  
22 attend M&M (*'My weeks are overloaded with duties related to my subspecialty (...) An  
23 unstoppable phenomenon. The generic conferences suffer from it.'* [#4]).

24 Reporting systems were appreciated for their value to collect local data, but lack of  
25 feedback was considered a missed opportunity to increase sense of urgency for topics and



1 encourage reporting behaviour. Residents currently perceived a barrier in that it was too  
2 labour-intensive and difficult to access local data, while this could provide essential support for  
3 case selection, presentations and follow-up. Many also missed systematic follow-up,  
4 evaluation and feedback on prior actions at M&M. (*'A sort of follow-up makes it all more  
5 cohesive, of course, it'll give you the feeling that you're all involved in a sort of improvement  
6 cycle rather than scattershot.'* [#8]).

7 Lack of continuity due to typical staff turnover in teaching hospitals was considered to  
8 hamper (sustaining) improvements (*'With varying doctors and trainees, you simply need to  
9 repeat things.(...) another group arrives from another hospital, with a different standard  
10 practice, where they were used to do things differently.'* [#9]). It was suggested, mostly by  
11 faculty, to assign dedicated staff to monitor outcome data and implement plans for  
12 improvement (*'(...) in task forces because they'll put it on their agenda and have something to  
13 say about that topic, about quality.'* [#11]).

14 General lack of time was mentioned in all but one interview, as an important barrier to  
15 preparation, attendance and realization of actions. Similarly, staff may face too many,  
16 sometimes conflicting, expectations (*'We expect single individuals to fulfil all these  
17 requirements for clinical practice, research, training, leadership and management (...) that's  
18 the inhibiting factor! Too many tasks and too many different tasks.'* [#2]). Receiving dedicated  
19 time to work on tasks arising from M&M was perceived to facilitate these processes. (*'We  
20 rather do it at night to avoid missing surgeries, clinic or clinical... that's the focus of our  
21 training, clinical practice. (...) If we decide, and acknowledge [that M&M is of equal  
22 importance], then I think that we should organize it in such a way that residents receive half a  
23 day to do these things.'* [#7]).

24 Only two external-level factors were reported: the 'nature' of healthcare, balancing  
25 risks and benefits (e.g. haemorrhage and thrombosis prevention) was perceived to prevent

1  
2  
3 1 complete eradication of adverse events, and benchmarking local performance against other  
4  
5 2 centres was often mentioned as an important facilitator, serving as a source of information and  
6  
7 3 motivator.  
8  
9  
10 4

### 11 5 **Pathways to M&M success**

12 6 The reported facilitators and barriers appeared to enhance or impede whether professionals are:

- 13 7 1) adequately *informed* to identify targets and plans for improvement;
- 14 8 2) *motivated* to participate in, and support, M&M practice and the ensuing actions;
- 15 9 3) willing and able to *realize* plans of action and bring about change.

16  
17  
18  
19  
20  
21  
22  
23 10  
24  
25 11 Hence, ‘information’, ‘motivation’, and ‘realization’ seemed to serve as potential mediating  
26  
27 12 pathways by which M&M drives learning and improvement (Box 1). These pathways could  
28  
29 13 also affect each other as, for example, information can motivate by increasing sense of  
30  
31 14 urgency, which may ultimately enhance realization efforts.  
32  
33  
34  
35  
36  
37  
38  
39  
40  
41  
42  
43  
44  
45  
46  
47  
48  
49  
50  
51  
52  
53  
54  
55  
56  
57  
58  
59  
60

## 1 DISCUSSION

2  
3  
4  
5  
6  
7 This qualitative study identified 57 different barriers and facilitators to successful M&M  
8  
9  
10 practice perceived by healthcare professionals, together covering 17 themes. Many factors  
11  
12 concerned organizational aspects, but others related to the individual or team level, such as  
13  
14 personal motivation or group dynamics. All factors affected whether participants are: 1)  
15  
16 *motivated* to participate and take action; 2) *well-informed* to identify targets and plans for  
17  
18 improvement; and 3) willing and able to *realize* plans; representing the mediating pathways to  
19  
20 M&M-based learning and improvement.  
21  
22

23  
24  
25 An important strength of this study lies in the qualitative approach, yielding nuanced insights  
26  
27 that quantitative assessments cannot reveal. To illustrate, qualitative analyses revealed the  
28  
29 complexity of various factors, such as hierarchy or team spirit, which appeared to have both  
30  
31 positive and negative effects at the same time. Moreover, data saturation was achieved and  
32  
33 many factors and pathways described in the study appeared to closely relate to more general  
34  
35 frameworks and theories of learning and change. An important limitation is the single centre  
36  
37 design of this study. The findings may particularly be representative of teaching hospitals as  
38  
39 interviewees worked at an academic hospital and their prior M&M experience was mostly at  
40  
41 other teaching hospitals. However, qualitative research does not pursue generalizability, but  
42  
43 rather aims to explore and develop a deeper understanding of a phenomenon of interest. As  
44  
45 interviewees worked in surgery these findings may not be fully representative of all medical  
46  
47 specialties that practice M&M. Additional qualitative research is required to reveal whether the  
48  
49 same facilitators and barriers apply to other specialties. This is likely the case, as the generic  
50  
51 mechanisms by which clinicians learn and improve through these conferences will be more  
52  
53 similar. Research on M&M in other settings, such as paediatrics and psychiatry, highlight  
54  
55  
56  
57  
58  
59  
60

1  
2  
3 1 similar success factors, including resources (i.e. time and staff),<sup>33,34</sup> leadership buy-in and  
4  
5 2 presence,<sup>34,35</sup> input from all staff levels,<sup>33-36</sup> and loop closure.<sup>33,35</sup> Moreover, in a previous  
6  
7 3 study, we found that departments with great variation in M&M practice shared the same  
8  
9  
10 4 expectations and challenges for M&M.<sup>29</sup> Moreover, the study findings appeared to fit well  
11  
12 5 within the more general frameworks for learning and improvement in healthcare (Appendix 3).  
13  
14 6

### 7 **Comparison with existing literature**

8 While M&M practice has often been subject of study, this is, to our knowledge, the first  
9  
10 9 qualitative study of M&M success factors. The present study adds novel insights into the roles  
11  
12 10 of various individual- and social-level factors, perceived as barriers, facilitators or both  
13  
14 11 simultaneously (Table 1). An example being ‘team spirit’, which was perceived as a potential  
15  
16 12 facilitator as well as barrier to openly voicing one’s opinions or concerns at M&M. Thus far,  
17  
18 13 individual or team-level factors have received scant attention in the M&M literature, with the  
19  
20 14 exception of the importance of ‘a blame-free culture’.<sup>2,5,12,20,37</sup> This study confirms the  
21  
22 15 importance of a ‘safe environment’, but also provides leads about what the desired culture or  
23  
24 16 ‘mindset’ for M&M encompasses. It seems that M&M should not only *elicit* input from all  
25  
26 17 participants,<sup>10,15,16</sup> but also truly *value* such input from all corners. In other words, attention  
27  
28 18 needs to be given to both the *sender* and *receiver* end to harness a truly open mindset at the  
29  
30 19 conference. The value of input from other disciplines was appreciated by interviewed  
31  
32 20 professionals, but multidisciplinary was also perceived as a potential threat to the open  
33  
34 21 environment that is so important for M&M. This finding adds nuance to previous studies  
35  
36 22 advocating for multidisciplinary M&M, expecting only positive effects.<sup>10,37-39</sup>  
37  
38  
39  
40  
41  
42  
43  
44  
45  
46  
47  
48  
49  
50  
51

52 23 This study revealed three mediating pathways by which M&M may successfully drive  
53  
54 24 learning and improvement, which were related to information, motivation and realization (Box  
55  
56 25 1). While the role of motivation has received little attention in prior M&M research, more  
57  
58  
59  
60

1  
2  
3 1 general publications about organizational learning or improvement have stressed the important  
4  
5 2 role of individual and team factors, such as motivation.<sup>21-24</sup> After all, leadership can create  
6  
7 3 strategies and improvement plans, but this will be insufficient without commitment and  
8  
9 4 support of front-line staff - 'culture eats strategy for breakfast'.<sup>24,40,41</sup> Pathways to M&M  
10  
11 5 success described in this study, appeared to closely relate to more general frameworks for  
12  
13 6 improvement and implementation in healthcare (Appendix 3). We attempted to translate the  
14  
15 7 findings of this qualitative study to actionable recommendations, enlisted in Box 2, targeting  
16  
17 8 one or more of the described pathways to M&M success. Some of these recommendations have  
18  
19 9 been reported in prior M&M studies, such as using local data<sup>42,43</sup> and extensive planning,<sup>10</sup> but  
20  
21 10 others more closely relate to learning behaviour literature, such as sense of urgency, motivation  
22  
23 11 and being receptive to new ideas.<sup>21,23,24,41</sup>  
24  
25  
26  
27  
28  
29

### 30 **Implications for M&M practice**

31  
32 14 The recommendations formulated based on the study findings, address some aspects of M&M  
33  
34 15 organization, but also aim to target challenges at the level of the (individual) professionals  
35  
36 16 (Box 2). Various complexities embedded in healthcare culture may complicate M&M practice,  
37  
38 17 one of which is working with colleagues with different hierarchical or expertise levels. These  
39  
40 18 professional boundaries might be overcome by promoting the desired mindset for M&M. As  
41  
42 19 with the 'culture of shame and blame', which used to be infamous for its presence at M&M,  
43  
44 20 these issues could be targeted with, for example, moderators and local leadership, guided by  
45  
46 21 principles of Just Culture.<sup>44,45</sup> As mentioned in the interviews, seniors or leaders can model  
47  
48 22 desired behaviour and attitudes at M&M, by openly discussing personal errors and addressing  
49  
50 23 the emotional impact. This is confirmed by the, to our knowledge, only other qualitative study  
51  
52 24 of M&M, conducted in internal medicine, which described this type of role-modelling at the  
53  
54 25 conference.<sup>46</sup> For example, the conference could start with framing the purpose as collegial and  
55  
56  
57  
58  
59  
60

1 non-blaming, as used in recently developed novel formats for M&M.<sup>33-35</sup>

2 An important question for future research appears to be how to motivate and engage all  
3 participants to receive the necessary input and support to actually improve clinical practice.  
4 Interviews reflected the paradoxical nature of hierarchy in this respect, as this can both help  
5 and hurt staff's motivation and support. Another solution may be to organize M&M in smaller,  
6 focused settings, such as subspecialties<sup>15</sup> or integrated care. Interviewees also perceived  
7 motivational effects of reviewing local or benchmark data and follow-up of actions from prior  
8 conferences, which could be incorporated into M&M practices to motivate participants and  
9 demonstrate the value of M&M.<sup>5,20</sup> More time for feedback and assessment of prior initiatives  
10 would mean that fewer topics can be discussed at M&M or that extra time needs to be made  
11 available, but this would both be worthwhile considering the expected positive effects on  
12 achieving sustainable improvements.

13

## 14 **CONCLUSION**

15 This study enhanced understanding of the factors influencing M&M-based learning and  
16 improvement, and the pathways by which this occurs. Many factors were related to the  
17 individual or team rather than how M&M is organized. These insights may be used to improve  
18 M&M practices, and provide a framework for further study on determinants of M&M success.  
19 Future research is warranted to investigate success factors for M&M, and specifically the  
20 extent to which these are transferable to other settings, in order to design a universally  
21 applicable best practice for M&M.

## APPENDICES

- **Appendix 1:** Topic list for semi-structured interviews with attending surgeons and residents.
- **Appendix 2:** Facilitators and barriers for successful M&M at different levels for achieving change in healthcare with illustrative quotes.
- **Appendix 3:** Relation of published frameworks for improvement in healthcare to this study's model of mediating pathways and practical recommendations.

## LIST OF ABBREVIATIONS

- M&M, morbidity and mortality conference(s)
- QI, quality improvement
- PA, physician assistant

## DECLARATIONS

**Ethical approval and consent to participate:** not required under Dutch law for this type of study. All interviewed professionals verbally consented to participate in this study.

**Consent for publication:** Not applicable.

**Data sharing statement:** Qualitative data generated and analysed in the current study are verbatim transcripts (in Dutch) and are not publicly available to protect the privacy of interviewees.

**Competing interest:** The authors declare that they have no competing interests.

**Funding:** This work was supported by a combined unrestricted grant from the board of directors of the Leiden University Medical Centre, Vogelgezang Foundation (no. 1519-01), Leiden University Fund (no. 5265/12-11-15) and the Michäel-Van Vloten Surgery Fund. Funders had no role in the study design; data analysis interpretation; writing of the report; or in the decision to submit the article for publication.

**Contributorship:** All authors (MdV, JH, PM) contributed to conception and design of this study. MdV generated, analysed and interpreted the data, wrote the first draft and revised drafts. JH revised the draft papers. PM supervised data analysis and interpretation and revised the draft paper. All authors have seen and approved the final draft. All authors received access to all the anonymized data in the study and take responsibility for the integrity and the accuracy of the data analysis. PM is guarantor.

1  
2  
3  
4  
5  
6  
7  
8  
9  
10  
11  
12  
13  
14  
15  
16  
17  
18  
19  
20  
21  
22  
23  
24  
25  
26  
27  
28  
29  
30  
31  
32  
33  
34  
35  
36  
37  
38  
39  
40  
41  
42  
43  
44  
45  
46  
47  
48  
49  
50  
51  
52  
53  
54  
55  
56  
57  
58  
59  
60

**Acknowledgments:** We like to show our gratitude to all faculty and residents willing to reflect and express their opinions so openly during the interviews. We thank Judith van Grafhorst for her valuable assistance with the interview transcriptions and analyses.

For peer review only



## REFERENCES

1. Xiong X, Johnson T, Jayaraman D, et al. At the Crossroad with Morbidity and Mortality Conferences: Lessons Learned through a Narrative Systematic Review. *Can J Gastroenterol Hepatol* 2016;2016:1-11.doi:10.1155/2016/7679196.
2. Orlander JD, Barber TW, Fincke BG. The morbidity and mortality conference: the delicate nature of learning from error. *Acad Med* 2002;77:1001-6.
3. Aboumatar H, Blackledge C, Dickson C, et al. A Descriptive Study of Morbidity and Mortality Conferences and Their Conformity to Medical Incident Analysis Models: Results of the Morbidity and Mortality Conference Improvement Study, Phase 1. *Am J Med Qual* 2007;22:232-8.
4. Nasca T, Philibert I, Brigham T, et al The Next GME Accreditation System — Rationale and Benefits. *N Engl J Med* 2012;366:1051-6.
5. Sacks GD, Lawson EH, Tillou A, et al. Morbidity and Mortality Conference 2.0. *Ann Surg* 2015;262:228-9.
6. Macrae C. The problem with incident reporting. *BMJ Qual Saf* 2016;25:71-5. doi:10.1136/bmjqs-2015-004732 [Published Online First: 7 September 2015].
7. Cooke DL, Dunscombe PB, Lee RC. Using a survey of incident reporting and learning practices to improve organisational learning at a cancer care centre. *Qual Saf Heal Care* 2007;16:342-8.
8. Ginsburg LR, Chuang YT, Norton PG, Berta W, Tregunno D, Ng P, Richardson J. Development of a measure of patient safety event learning responses: Patient safety and public health. *Health Serv Res* 2009;44:2123-47.
9. Vincent C. Understanding and Responding to Adverse Events. *N Engl J Med* 2003;348:1051-6.
10. Bal G, Sellier E, Tchouda SD, et al. Improving quality of care and patient safety through morbidity and mortality conferences. *J Healthc Qual* 2014;36:29–36.

- 1  
2  
3 11. François P, Prate F, Vidal-Trecan G, et al. Characteristics of morbidity and mortality  
4 conferences associated with the implementation of patient safety improvement initiatives, an  
5 observational study. *BMC Health Serv Res* 2016;16:35. doi:10.1186/s12913-016-1279-8  
6  
7 [Published Online First: 30 January 2016].  
8  
9
- 10  
11 12. Bechtold ML, Scott S, Dellsperger KC, et al. Educational quality improvement report: outcomes  
12 from a revised morbidity and mortality format that emphasised patient safety. *Postgrad Med J*  
13 2008;84:211-6.  
14
- 15  
16 13. Gordon L. Gordon's Guide to the Surgical Morbidity and Mortality Conference. Philadelphia,  
17 PA, USA: Hanley and Belfus; 1994.  
18
- 19  
20 14. Murayama KM, Derossis AM, DaRosa DA, et al. A critical evaluation of the morbidity and  
21 mortality conference. *Am J Surg* 2002;183:246-50.  
22
- 23  
24 15. Gore DC. National survey of surgical morbidity and mortality conferences. *Am J Surg*  
25 2006;191:708-14.  
26
- 27  
28 16. Risucci DA, Sullivan T, DiRusso S, et al Assessing educational validity of the Morbidity and  
29 Mortality conference: a pilot study. *Curr Surg* 2003;60:204-9.  
30
- 31  
32 17. Lecoanet A, Vidal-Trecan G, Prate F, et al. Assessment of the contribution of morbidity and  
33 mortality conferences to quality and safety improvement: a survey of participants' perceptions.  
34 *BMC Health Serv Res* 2016;16:176. doi:10.1186/s12913-016-1431-5 [Published Online First:  
35 11 May 2016].  
36
- 37  
38 18. Harbison SP, Regehr G. Faculty and resident opinions regarding the role of morbidity and  
39 mortality conference. *Am J Surg* 1999;177:136-9.  
40
- 41  
42 19. Kim MJ, Fleming FJ, Peters JH, et al. Improvement in educational effectiveness of morbidity  
43 and mortality conferences with structured presentation and analysis of complications. *J Surg*  
44 *Educ* 2010;67:400-5.  
45
- 46  
47 20. Flynn-O'brien KT, Mandell SP, Eaton E Van, et al. Surgery and Medicine Residents'  
48  
49  
50  
51  
52  
53  
54  
55  
56  
57  
58  
59  
60

- 1  
2  
3 Perspectives of Morbidity and Mortality Conference: An Interdisciplinary Approach to Improve  
4 ACGME Core Competency Compliance. *J Surg Educ* 2015;72:258-66.  
5  
6  
7  
8 21. Chuang Y-T, Ginsburg L, Berta WB. Learning from preventable adverse events in health care  
9 organizations: development of a multilevel model of learning and propositions. *Health Care*  
10 *Manage Rev* 2007;32:330-40.  
11  
12  
13  
14 22. Grol R, Wensing M. What drives change? Barriers to and incentives for achieving  
15 evidence-based practice. *Med J Aust* 2004;180:57-60.  
16  
17  
18  
19 23. Gibson C, Vermeulen F. A Healthy Divide: Subgroups as a Stimulus for Team Learning  
20 Behavior. *Adm Sci Q* 2003;48:202-39.  
21  
22  
23  
24 24. Carroll J, Edmondson A. Leading organisational learning in health care. *Qual Saf Heal Care*  
25 2002;11:51-56.  
26  
27  
28  
29 25. DiCicco-Bloom B, Crabtree BF. The qualitative research interview. *Med Educ* 2006;40:314-21.  
30  
31  
32  
33 26. Francis JJ, Johnston M, Robertson C, et al. What is an adequate sample size? Operationalising  
34 data saturation for theory-based interview studies. *Psychol Health* 2010;25:1229-45.  
35  
36  
37  
38 27. O'Brien BC, Harris IB, Beckman TJ, et al. Standards for Reporting Qualitative Research. *Acad*  
39 *Med* 2014;89:1245-51.  
40  
41  
42  
43 28. Kievit J, Krukerink M, Marang-van de Mheen PJ. Surgical adverse outcome reporting as part of  
44 routine clinical care. *Qual Saf Health Care* 2010;19:e20. doi:10.1136/qshc.2008.027458  
45 [Published Online First: 29 April 2010].  
46  
47  
48  
49 29. de Vos MS, Marang-van de Mheen PJ, Smith AD, et al. Towards Best Practices for Surgical  
50 Morbidity & Mortality Conferences: A Mixed Methods Study. *J Surg Educ* Published Online  
51 First:15 July 2017. doi:10.1016/j.jsurg.2017.07.002  
52  
53  
54  
55  
56 30. Braun V, Clarke V. Using thematic analysis in psychology. *Qual Res Psychol* 2006;3:77-101.  
57  
58  
59  
60 31. Saldaña J. The Coding Manual for Qualitative Researchers. London, UK: SAGE Publications  
Ltd; 2009.

- 1  
2  
3 32. de Vos MS, Smith AD, Shimizu N, et al. Surgical Quality Improvement Book (chapter 5):  
4 Morbidity and Mortality Conference: a Weekly Conference Designed to Improve Surgical  
5 Quality.  
6  
7  
8  
9 [http://www.brighamandwomens.org/Departments\\_and\\_Services/surgery/qiChapter5.aspx?sub](http://www.brighamandwomens.org/Departments_and_Services/surgery/qiChapter5.aspx?sub=0)  
10 [=0](http://www.brighamandwomens.org/Departments_and_Services/surgery/qiChapter5.aspx?sub=0) [accessed July 24, 2017]  
11  
12  
13  
14 33. Cromeens B, Brill R, Kurtovic K et al. Implementation of a pediatric surgical quality  
15 improvement (QI)-driven M&M conference. *J Pediatr Surg* 2016;51:137-42.  
16 doi:10.1016/j.jpedsurg.2015.10.032 [Published Online First: 23 October 2015].  
17  
18  
19  
20 34. Wasser T, Grunschel BD, Stevens A, et al. Transforming Systems of Care Through a Novel  
21 Resident-Led Approach to Morbidity and Mortality Conferences. *Acad Psychiatry*  
22 2016;40:893-7. doi:10.1007/s40596-016-0606-z [Published Online First: 19 August 2016].  
23  
24  
25  
26  
27 35. Gerstein WH, Ledford J, Cooper J, et al. Interdisciplinary Quality Improvement Conference:  
28 Using a Revised Morbidity and Mortality Format to Focus on Systems-Based Patient Safety  
29 Issues in a VA Hospital: Design and Outcomes. *Am J Med Qual* 2016;31:162-8.  
30 doi:10.1177/1062860614555430 [Published Online First: 20 October 2016].  
31  
32  
33  
34  
35  
36 36. Frey B, Doell C, Klauwer D, et al. The Morbidity and Mortality Conference in Pediatric  
37 Intensive Care as a Means for Improving Patient Safety. *Pediatr Crit Care Med* 2016;17:67-72.  
38  
39  
40  
41 37. Kwok ESH, Calder LA, Barlow-Krelina E, et al. Implementation of a structured hospital-wide  
42 morbidity and mortality rounds model. *BMJ Qual Saf* 2016;26:439-48.  
43 doi:10.1136/bmjqs-2016-005459 [Published Online First: 29 June 2016].  
44  
45  
46  
47 38. Kauffmann RM, Landman MP, Shelton J, et al. The Use of a Multidisciplinary Morbidity and  
48 Mortality Conference to Incorporate ACGME General Competencies. *J Surg Educ*  
49 2011;68:303-8.  
50  
51  
52  
53  
54 39. Deis JN, Smith KM, Warren MD, et al. Transforming the Morbidity and Mortality Conference  
55 into an Instrument for Systemwide Improvement (In: *Advances in Patient Safety: New*  
56 *Directions and Alternative Approaches; Vol. 2: Culture and Redesign*).  
57  
58  
59  
60

- 1  
2  
3 <http://www.ncbi.nlm.nih.gov/pubmed/21249895> [accessed March 23, 2017].  
4  
5  
6 40. Dixon-Woods M, Leslie M, Tarrant C, et al. Explaining Matching Michigan: an ethnographic  
7 study of a patient safety program. *Implement Sci* 2013;8:70.  
8  
9  
10 41. Dixon-Woods M, McNicol S, Martin G. Ten challenges in improving quality in healthcare:  
11 lessons from the Health Foundation's programme evaluations and relevant literature. *BMJ Qual*  
12 *Saf* 2012;21:876-84. doi:10.1136/bmjqs-2011-000760 [Published Online First: 28 April 2012].  
13  
14  
15  
16 42. Hamby LS, Birkmeyer JD, Birkmeyer C, et al. Using Prospective Outcomes Data to Improve  
17 Morbidity and Mortality Conferences. *Curr Surg* 2000;57:384-88.  
18  
19  
20  
21 43. Hutter MM, Rowell KS, Devaney LA, et al. Identification of Surgical Complications and  
22 Deaths: An Assessment of the Traditional Surgical Morbidity and Mortality Conference  
23 Compared with the American College of Surgeons-National Surgical Quality Improvement  
24 Program. *J Am Coll Surg* 2006;203:618-24.  
25  
26  
27  
28  
29  
30 44. Martinez W, Lehmann LS, Hu Y-Y, et al. Processes for Identifying and Reviewing Adverse  
31 Events and Near Misses at an Academic Medical Center. *Jt Comm J Qual Patient Saf*  
32 2017;43:5-15. doi:10.1016/j.jcjq.2016.11.001 [Published Online First: 3 November 2016].  
33  
34  
35  
36  
37 45. Dekker S. Just Culture: Restoring Trust and Accountability in Your Organization. Taylor &  
38 Francis Ltd; 2016.  
39  
40  
41 46. Kuper A, Zur Nedden N, Etchells E, et al. Teaching and learning in morbidity and mortality  
42 rounds: an ethnographic study. *Med Educ* 2010;44:559-69.  
43  
44  
45  
46  
47  
48  
49  
50  
51  
52  
53  
54  
55  
56  
57  
58  
59  
60

**Table 1.** Facilitators and barriers to successful M&M practice, grouped in themes and structured across levels of a framework for achieving change in healthcare.

| <i>Theme</i>                   | <i>Factor</i>                   | <i>Facilitator</i><br>(+) | <i>Barrier</i><br>(-) |
|--------------------------------|---------------------------------|---------------------------|-----------------------|
| <i>I) Case level</i>           |                                 |                           |                       |
| <b>Type of case (1)</b>        | Attractive topic                | +                         |                       |
|                                | Clinical relevance              | +                         |                       |
|                                | Value for education/improvement | +                         |                       |
| <b>Information (2)</b>         | Include local data              | +                         |                       |
|                                | Literature                      | +                         |                       |
|                                | Skills education                | +                         |                       |
|                                | Information from those involved | +                         | -                     |
|                                | Addressing system factors       | +                         |                       |
| <b>Presentation (3)</b>        | Addressing 'soft skills'        | +                         |                       |
|                                | Qualified presenter             | +                         |                       |
|                                | Proper preparation              | +                         |                       |
|                                | Proper supervision              | +                         |                       |
|                                | Fixed format                    | +                         |                       |
| <i>II) Action level</i>        |                                 |                           |                       |
| <b>Type of plan (4)</b>        | Attractive topic                | +                         |                       |
|                                | Clinically significant topic    | +                         |                       |
|                                | More disciplines involved       |                           | -                     |
| <b>Planning (5)</b>            | Higher complexity               |                           | -                     |
|                                | Explicitly formulated           | +                         |                       |
|                                | Responsibility assigned         | +                         | -                     |
|                                | Time frame determined           | +                         |                       |
|                                | Included in protocols           | +                         |                       |
| <i>III) Individual level</i>   |                                 |                           |                       |
| <b>Motivation (6)</b>          | Intrinsic motivation            | +                         |                       |
|                                | Interest in specific topic      | +                         |                       |
|                                | Values/beliefs                  | +                         | -                     |
|                                | Other priorities/incentives     |                           | -                     |
| <b>Participation (7)</b>       | Personality                     | +                         | -                     |
| <b>Realization (8)</b>         | Empowerment, control            | +                         |                       |
|                                | Forgetfulness                   |                           | -                     |
| <i>IV) Social level</i>        |                                 |                           |                       |
| <b>Culture (9)</b>             | Safe environment                | +                         |                       |
|                                | Team spirit                     | +                         | -                     |
|                                | Super specialization            |                           | -                     |
| <b>Leadership (10)</b>         | Reinforcing attendance          | +                         |                       |
|                                | Reinforcing actions             | +                         |                       |
|                                | Hierarchy                       | +                         | -                     |
|                                | Exemplary behaviour             | +                         |                       |
| <b>Participants (11)</b>       | Participation of experts        | +                         |                       |
|                                | Interactivity                   | +                         |                       |
|                                | Audience composition/size       | +                         | -                     |
|                                | Multidisciplinary participation | +                         | -                     |
| <b>Moderation (12)</b>         | Qualified moderator             | +                         |                       |
| <i>V) Organizational level</i> |                                 |                           |                       |
| <b>M&amp;M format (13)</b>     | Strong focus on improvement     | +                         |                       |
|                                | M&M in specialist setting       | +                         |                       |
|                                | Communications (before/after)   | +                         |                       |
|                                | Too many cases per meeting      |                           | -                     |
|                                | No tracking of actions          |                           | -                     |

|                           |  |                                |   |
|---------------------------|--|--------------------------------|---|
|                           |  | No check/feedback on effect    | - |
| <b>Reporting (14)</b>     |  | System for data collection     | + |
|                           |  | Difficult access to data       | - |
|                           |  | Lack of feedback from data     | - |
| <b>Staff (15)</b>         |  | Dedicated staff/committee      | + |
|                           |  | Super specialization           | - |
|                           |  | Staff turnover                 | - |
|                           |  | Other/conflicting expectations | - |
| <b>Time (16)</b>          |  | Overall lack of time           | - |
|                           |  | Receiving dedicated time       | + |
| <i>VI) External level</i> |  |                                |   |
| <b>Healthcare (17)</b>    |  | Inevitability ('nature')       | - |
|                           |  | Benchmarking                   | + |

*M&M*, Morbidity and Mortality conference.

**Box 1.** Mediating pathways for M&M-based learning and improving that are affected by reported facilitators and barriers.

|                                                                                   |                                                                                                                                                                                         |
|-----------------------------------------------------------------------------------|-----------------------------------------------------------------------------------------------------------------------------------------------------------------------------------------|
|  | <p><b>INFORMATION</b> (<i>to know</i>)<br/>i.e. complete/clear/accessible information, presentations, data/trends, communications, feedback, input/discussion, dissemination.</p>       |
|  | <p><b>MOTIVATION</b> (<i>to want</i>)<br/>i.e. participant attendance, participation, experience, engagement, support, sense of urgency.</p>                                            |
|  | <p><b>REALIZATION</b> (<i>to can/do</i>)<br/>i.e. ensure a clear objective and extensive plan, feasibility, empowerment for change, follow-up/tracking, (re)evaluation, sustaining.</p> |

M&M, Morbidity and Mortality conference.



**Box 2.** Recommendations for successful M&M practice based on identified facilitators and barriers, and mediating pathways for M&M-based learning and improvement.<sup>1</sup>

| <b>Recommendation</b>                                                             | <b>Further details (related themes in Table 1)</b>                                                                                                                                                                   |
|-----------------------------------------------------------------------------------|----------------------------------------------------------------------------------------------------------------------------------------------------------------------------------------------------------------------|
| <b>1. URGENCY</b>                                                                 |                                                                                                                                                                                                                      |
| <b>Select topics relevant to the audience and demonstrate a sense of urgency.</b> | Ensure topics are applicable to one's own practice, clinically significant and accompanied by a sense of urgency, e.g. by supporting presentations with (local) data on incidences and harm (1,4,13)                 |
| <b>2. INFORMATION</b>                                                             |                                                                                                                                                                                                                      |
| <b>Maximize informativeness and attractiveness of presentations.</b>              | Use well-prepared presenters, engagement of those involved in cases, and fixed presentation formats including case details, literature, local/benchmark data as well as system-level and soft/human factors (2,3,6). |
| <b>3. PLANNING</b>                                                                |                                                                                                                                                                                                                      |
| <b>Be explicit in terms of action items and follow-up.</b>                        | Determine who will do what, when, and how, with a plan for follow-up and re-evaluation (5,10,13).                                                                                                                    |
| <b>4. MOTIVATION</b>                                                              |                                                                                                                                                                                                                      |
| <b>Motivate participants through interactivity and feedback.</b>                  | Ensure that participants are motivated, e.g. by using moderators to promote interactivity and 'close the loop' on prior actions through evaluation and feedback (6,10-14).                                           |
| <b>5. ANTICIPATION</b>                                                            |                                                                                                                                                                                                                      |
| <b>Consider feasibility of actions, and anticipate and counter problems.</b>      | Anticipate and plan how to counter problems with realization and sustaining of actions, e.g. due to complexity, lack of empowerment or engagement of all staff involved, or staff turnover (4,7,10).                 |
| <b>6. INPUT</b>                                                                   |                                                                                                                                                                                                                      |
| <b>Draw upon collective expertise of participants.</b>                            | Ensure presence and input from all involved in care processes, e.g. by actively inviting comments from experts, juniors or other disciplines (7,9-11).                                                               |
| <b>7. RECEPTIVITY</b>                                                             |                                                                                                                                                                                                                      |
| <b>Cultivate an open mindset, receptive to all input and opportunities.</b>       | Emphasize that input of all involved in care is essential and valued as such, and underline the need to be sensitive to 'weak signals' that may signal opportunities for improvement (7,9-13).                       |
| <b>8. SETTING</b>                                                                 |                                                                                                                                                                                                                      |
| <b>Consider M&amp;M meetings in specialist settings.</b>                          | In meetings on the subspecialty or multidisciplinary level ('integrated care'), participants may be more informed and in control as topics are more closely related to their daily practice (8,9,13,15).             |

**9. RESOURCES****Dedicate time and staff to M&M practice and ensuing plans for improvement.**

Consider blocking time for attendance but also preparation and realization of actions, and consider use of a dedicated committee or staff to implement plans that ensue from M&M (6,10,15).

**10. DATA****Dedicate time and staff to M&M practice and ensuing actions for improvement.**

Ensure that data collection and monitoring systems are accessible to allow assessment of local performance, benchmarking against others and re-evaluation of prior plans for improvement (14, 17).

<sup>1</sup> There is no hierarchical order in this list. Numbers How recommendations relate to earlier published frameworks for improvement in healthcare and to mediating pathways, is depicted in Appendix 3.

1  
2  
3 **Appendix 1.** Topic list for semi-structured interviews with attending surgeons and residents.  
4  
5

6 Introduction

- 7 - Background and objectives  
8 - Information about interview (anonymity, safe)  
9 - Information about participant: years of work experience at the department.  
10  
11

12 Morbidity and Mortality conference (M&M)

- 13 - How do you feel about M&M practice? What do you value? What do you miss/would you like to  
14 change?  
15 - Do you consider M&M part of your profession (i.e. core business)?  
16 - What affects whether learning occurs through M&M?  
17 - What affects whether improvement occurs through M&M?  
18 - What is the role of adverse event reporting in this?  
19  
20  
21

22 Other topics:

23 Case selection

24 Prompts:

- 25 - What criteria should be used to select cases for M&M and why?  
26 - Could a case of another surgical subspecialty be of educational value (to you)?  
27  
28

29 Presentation

30 Prompts:

- 31 - Who could best present the case and why? (senior or junior staff; involved in case or not)  
32 - Would a fixed presentation format be beneficial or limiting?  
33 - What information is essential to a successful M&M (e.g. local data)?  
34

35 Attendance

36 Prompts:

- 37 - To what extent do logistic factors, e.g. OR schedules, influence M&M attendance rates?  
38 - Would attendance rates benefit from mandatory attendance, e.g. with sign-in sheets,  
39 or from exemplary behaviour of staff?  
40 - How would personal beliefs or motivation influence attendance rates?  
41

42 Moderator

43 Prompts:

- 44 - Who could best moderate and how?  
45 - To what extent does the moderator influence success of M&M (e.g. environment)?  
46  
47

48 Culture

49 Prompts:

- 50 - Is there an open environment, free of shame and blame? What illustrates/influences that?  
51 - If you're at another department, how could you assess whether there is a blame-free culture?  
52 - Example: a postoperative haemorrhage case is presented at M&M, you've also been present  
53 in operating room and you now remember that you had doubts about haemostasis, would you  
54 mention that? What (potential) consequences could such a comment have?  
55

56 Plans for improvement

57 Prompts:

- 58 - What affects whether formulated plans of action are successfully implemented?  
59 - Are lessons explicitly formulated and documented? How would this affect implementation?  
60 - How are plans tracked for implementation? Who should be responsible for this?

**Appendix 2.** Facilitators and barriers for successful M&M at different levels for achieving change in healthcare with illustrative quotes.

| Theme                   | Facilitator (F) and/or barrier (B)    | Illustrative quote                                                                                                                                                                                                                                                                                                                                                                                               |
|-------------------------|---------------------------------------|------------------------------------------------------------------------------------------------------------------------------------------------------------------------------------------------------------------------------------------------------------------------------------------------------------------------------------------------------------------------------------------------------------------|
| <i>I) Case level</i>    |                                       |                                                                                                                                                                                                                                                                                                                                                                                                                  |
| Type of case            | Attractive topic (F)                  | 'Surgery (...) something technical, you can visualize, (...) makes it easier to remember and to disseminate it to others(...) It might be more, well, fun, to learn about something 'operative'. '(#8)                                                                                                                                                                                                           |
|                         | Clinical relevance (F)                | 'While some topics may be less interesting (...) pressure ulcers or hospital acquired pneumonia for example, these are still of clinical relevance.' (#1)                                                                                                                                                                                                                                                        |
|                         | Value for education/improvement(F)    | 'A preference to discuss recent cases makes that you select a severe haemorrhage case while that actually went very well all year. It's key to identify and select real targets for improvement.' (#5)                                                                                                                                                                                                           |
| Information             | Include local data (F)                | 'Especially if you review your own numbers, that would provide valuable insights.' (#3)<br>'(...) pneumonia, everyone will be like 'oh no, boring', but if you present a concise plan and numbers and those things, then, I think that'd be very nice, because that concerns everyone.' (#5)                                                                                                                     |
|                         | Literature (F)                        | 'Why do I have to see 6000 graphs? (...) Just use the conclusions of the best papers (#1)'<br>'Just a few relevant papers, somewhat related to your own patient population.' (#8)<br>'Everyone thinks 'Well, how's our performance? Where are we compared to the literature?' (#9)<br>'Nationally, globally, are we above or below the line?' (#11)                                                              |
|                         | Skills education (F)                  | 'The presentation needs to include the very technical things, regarding surgical techniques.' (#6)<br>'You just want to prevent those errors and that's purely technical I think.' (#10)                                                                                                                                                                                                                         |
|                         | Information from those involved (F+B) | F: 'If you've been involved, it's nice to present that case and the content benefits from it too.' (#9)<br>B: 'The disadvantage of being emotionally involved is that you're sort of biased. [And can that bias impede learning?] Well yes, I think, cause it's only part of the story, from someone who's emotionally involved (...) difficult to keep it factual when the message is already 'coloured'.' (#7) |
|                         | Addressing system factors (F)         | 'I think, if the focus of the conference would shift towards system-level improvement, one would be more inclined to offer their opinion (...) it would yield more input.' (#5)                                                                                                                                                                                                                                  |
|                         | Addressing 'soft skills' (F)          | 'That's where this conference should be about (...) because then you don't learn from each other about content knowledge, but behavioural aspects – something 'the department' still shares (#2)'<br>'we are humans (...)let's go back to the moment it happened: What did you forget? What were you doing? Were you busy? (#7)                                                                                  |
|                         | Presentation                          | Qualified presenter (F)                                                                                                                                                                                                                                                                                                                                                                                          |
| Proper preparation (F)  |                                       | '[What makes that it does result in concrete targets?] 'The level of preparation by all means.' (#1)                                                                                                                                                                                                                                                                                                             |
| Proper supervision (F)  |                                       | 'As long as there's proper supervision. No, it's not about the presentation of course, it's about the well-thought construction of your story, all things sorted out and whether these are correct.' (#3)                                                                                                                                                                                                        |
| Fixed format (F)        |                                       | 'Yes I think that has benefits [a fixed format], it makes it easier to make, for residents, less time, and you don't provide them the space to stray off topic, that it'll get to lengthy.' (#4)                                                                                                                                                                                                                 |
| <i>II) Action level</i> |                                       |                                                                                                                                                                                                                                                                                                                                                                                                                  |
| Type of plan            | Attractive topic (F)                  | 'If it's about a thread that resorbs faster, we're all extremely eager to say: 'we should use that!' (...) while if it's about antibiotics I day more or less, it really doesn't interest anyone.' (#1)                                                                                                                                                                                                          |
|                         | Clinically significant topic (F)      | 'Patients might die (...) is life threatening, so then you've got an incentive to do something.' (#3)                                                                                                                                                                                                                                                                                                            |

|                              |                                                                |                                                                                                                                                                                                                                                                                                                                                                                                                                                                                                                                            |
|------------------------------|----------------------------------------------------------------|--------------------------------------------------------------------------------------------------------------------------------------------------------------------------------------------------------------------------------------------------------------------------------------------------------------------------------------------------------------------------------------------------------------------------------------------------------------------------------------------------------------------------------------------|
|                              | More disciplines involved (B)                                  | <i>'How many people in the organization are involved? Lessons [i.e. to improve future care] that involve thousands of stakeholders are more difficult than those you can realize on your own.'</i> (#4)                                                                                                                                                                                                                                                                                                                                    |
|                              | Higher complexity (B)                                          | <i>'Some things are technical, you can visualize them (...) a clear intervention, because you either do it or you don't – while others more greatly depend on multiple factors.'</i> (#8)                                                                                                                                                                                                                                                                                                                                                  |
| <b>Planning</b>              | Explicitly formulated (F)                                      | <i>'I think because, it is most interesting when you head home thinking 'Darn. I'll do that differently tomorrow'. (...) and preferably within 15 minutes. Short and concise'</i> (#11)                                                                                                                                                                                                                                                                                                                                                    |
|                              | Responsibility assigned (F+B)                                  | <i>F: 'It shouldn't be non-committal, you should really earmark people.'</i> (#11)<br><i>B: 'If you just send someone off like 'you go do that', that won't work, it has been proven.'</i> (#9)                                                                                                                                                                                                                                                                                                                                            |
|                              | Time frame determined (F)                                      | <i>'Give it a month and then: 'Well a month ago we've discussed this, what has been done?' Then you really trigger someone.'</i> (#5)<br><i>'We'll discuss this in 3 months and then we'll assess progress, did anything change?' - that way it's not so vague. It will be remembered and will definitely have a follow-up attached to it.</i> (#9)                                                                                                                                                                                        |
|                              | Included in protocols (F)                                      | <i>'It's challenging to translate lessons learned into changes in protocols or policies, but once you've connected those, well yes, then you're really going to improve your quality.'</i> (#9)                                                                                                                                                                                                                                                                                                                                            |
| <i>III) Individual level</i> |                                                                |                                                                                                                                                                                                                                                                                                                                                                                                                                                                                                                                            |
| <b>Motivation</b>            | Intrinsic motivation for QI (F)                                | <i>'In part it's about your motivation for that, that you just want to, just want to improve. If you're like 'it will all work out', yes, well, then nothing will happen.'</i> (#1)                                                                                                                                                                                                                                                                                                                                                        |
|                              | Interest in specific topic (F) (applicable, interest, urgency) | <i>'(...) when it's personal, when it's applicable to your own work, then you learn from it (...) also when it involves your own surgical service then it suddenly becomes top priority.'</i> (#11)                                                                                                                                                                                                                                                                                                                                        |
|                              | Values/beliefs (F+B)                                           | <i>F: '(...) experienced as a chore, which in itself isn't bad (...) some things are chores, but just need to be done'</i> (#4)<br><i>B: 'If you consider your job to be solely about operating, then you're not interested (...)'</i> (#11)                                                                                                                                                                                                                                                                                               |
|                              | Other priorities/incentives (B)                                | <i>'[residents] don't do it [free up time for actions], because we rather do it in the evening to avoid missing surgeries, clinic or clinical.. that's the focus of our training, clinical practice'</i> (#7)                                                                                                                                                                                                                                                                                                                              |
| <b>Participation</b>         | Personality (F+B)                                              | <i>F: 'It has to do with the type you hire. If it's the timid, anxious – yes, well then little will be said. But if you hire people with a big mouth, you will hear a lot of talking but not a lot of content (...)'</i> I think, you should tell the juniors: listen, if you don't dare, then you shouldn't be here.' (#2)<br><i>B: 'I think that [fear of speaking up] is in part related to personality, I want to avoid offending others, so that's something that has to do with me personally rather than the environment.'</i> (#7) |
| <b>Realization</b>           | Empowerment, control (F)                                       | <i>'If it's about knot X instead of Y, that's something we can execute, we understand that, we are in control for that, and thus we will do it. (...) Surgeons are particularly in control in the OR.'</i> (#7)<br><i>'No matter how hard I'd try if they [anaesthesia] won't do something then they don't want and I can't influence that; while if a certain thread has better outcomes, I can change that myself.'</i> (#9)                                                                                                             |
|                              | Forgetfulness (B)                                              | <i>'But we haven't done that [actions] yet. Just because other things receive priority and because you simply forget about it.'</i> (#8)                                                                                                                                                                                                                                                                                                                                                                                                   |
| <i>IV) Social level</i>      |                                                                |                                                                                                                                                                                                                                                                                                                                                                                                                                                                                                                                            |
| <b>Culture</b>               | Safe environment (F)                                           | <i>'There needs to be an open environment, non-judgmental, I think that is the crux of the matter, because otherwise you won't learn anything, people will put their foot down and get angry.'</i> (#9)                                                                                                                                                                                                                                                                                                                                    |
|                              | Team spirit (F+B)                                              | <i>F: 'They [subspecialty] know what I'm worth and I know their capacities, which creates a safe environment [for speaking up].'</i> (#1)<br><i>B: 'It's considered 'not done' - to not support each other [in discussions] – it's disloyal.'</i> (#7)<br><i>'Backstabbing undermines team spirit and most people in surgery are team players (...) so you'll always behave in the interest</i>                                                                                                                                            |

|                         |                                       |                                                                                                                                                                                                                                                                                                                                                                                                                                                                                                                                |
|-------------------------|---------------------------------------|--------------------------------------------------------------------------------------------------------------------------------------------------------------------------------------------------------------------------------------------------------------------------------------------------------------------------------------------------------------------------------------------------------------------------------------------------------------------------------------------------------------------------------|
|                         |                                       | <i>of the team.</i> (#8)                                                                                                                                                                                                                                                                                                                                                                                                                                                                                                       |
|                         | Super specialization (B)              | <i>'It's not 'us surgeons' anymore, it's a totally different organization.'</i> (#2)                                                                                                                                                                                                                                                                                                                                                                                                                                           |
|                         | Reinforcing attendance (F)            | <i>'It sounds bland, but it works, someone who says angrily: 'You have to attend, I'm the boss.'</i> (#4)                                                                                                                                                                                                                                                                                                                                                                                                                      |
|                         | Reinforcing actions (F)               | <i>'It works to promote action (...) that you'll fulfil your commitments (...) when you fear that if you won't do it you will get a roasting.'</i> (#7)                                                                                                                                                                                                                                                                                                                                                                        |
| <b>Leadership</b>       | Hierarchy (F+B)                       | <i>F: 'It's [attendance behaviour] more due to hierarchy, e.g. if attending X is always there, you'd need a good reason to be absent when X is there. He's got more important stuff to do than you, so it's probably important then. I definitely think that works.'</i> (#3)<br><i>B: 'If you really want to promote free speech, then faculty should emphasize that hierarchy is put aside during such a meeting.'</i> (#7)                                                                                                  |
|                         | Exemplary behaviour (F)               | <i>'I think if you're a resident on a rotation and a faculty member will also be absent, they you'd think, well why would I go? Yes, it's a sort of exemplary role.'</i> (#1)                                                                                                                                                                                                                                                                                                                                                  |
|                         | Participation of experts (F)          | <i>'Input from someone with experience, more 'master level' in addition to trainees. (...) Yes, [someone involved in the case] with enough 'flight hours' to be able to evaluate it.'</i> (#1)<br><i>'It's about content experts. (...) Half of our faculty members don't even know how to prescribe medications with the hospital software, so they shouldn't say anything about that.'</i> (#2)                                                                                                                              |
|                         | Interactivity (F)                     | <i>'[moderators] can evoke discussion by asking stimulating questions giving people in the audience the opportunity to respond.'</i> (#12)                                                                                                                                                                                                                                                                                                                                                                                     |
| <b>Participants</b>     | Audience composition/size (F+B)       | <i>F: 'Some people are more receptive to critique than others.'</i> (#4)<br><i>'The conference benefits from high attendance rates.'</i> (#8)<br><i>B: 'Well that [courage to speak up] depends on who's present, their interests and whether you could damage people.(...) It's by all means safer to discuss things in a smaller group.'</i> (#1)<br><i>'I think in a smaller setting (...) less [plans] will 'get lost'. It's a disadvantage that you reach fewer people, but the advantage is that less is lost.'</i> (#3) |
|                         | Multidisciplinary participation (F+B) | <i>F: 'If a nurse was involved then she needs to be present too. (...) We could discuss interesting cases with other specialists (...) we can really learn a lot together.'</i> (#6)<br><i>B: 'For some, if, say, nurses and other people are present, you would perhaps be less inclined to tell your boss that something went not so well.'</i> (#5)                                                                                                                                                                         |
| <b>Moderation</b>       | Qualified moderator (F)               | <i>'The role of the moderator, who has an important role in lowering the barrier [to speaking up] and be inviting, to create an environment that allows that.'</i> (#1)                                                                                                                                                                                                                                                                                                                                                        |
| <i>IV) Social level</i> |                                       |                                                                                                                                                                                                                                                                                                                                                                                                                                                                                                                                |
|                         | Strong focus on improvement (F)       | <i>'We should attribute more time to exploring how we're going to improve (...) this conference is meant to achieve improvement rather than to present the most exciting case of the month.'</i> (#5)                                                                                                                                                                                                                                                                                                                          |
|                         | M&M in specialist setting (F)         | <i>'For subspecialist themes, I think the output will be much better if you'd discuss those in a smaller group within the surgical service, there will be a much safer environment too.'</i> (#1)<br><i>'Like love. I'm in love with my service and I'd do everything to ensure things run smoothly'</i> (#6)<br><i>'If it concerns your division, then you're really motivated to get those [complication] numbers down, then it suddenly becomes top priority.'</i> (#11).                                                   |
| <b>M&amp;M format</b>   | Communications (before/after) (F)     | <i>'(...) to send out some sneak previews, that will motivate people to attend.'</i> (#8)<br><i>'If something derives from it, it'll be nice to know, but you'd have to keep the email short.'</i> (#5)                                                                                                                                                                                                                                                                                                                        |
|                         | Too many cases per meeting (B)        | <i>'You won't make it [to discuss many cases] and it takes up so much energy and time, that you might miss lessons to be learned from cases.'</i> (#8)                                                                                                                                                                                                                                                                                                                                                                         |
|                         | No tracking of actions (B)            | <i>'And then what? It [action] ends up in a folder or email or something, that's not working.'</i> (#3)                                                                                                                                                                                                                                                                                                                                                                                                                        |



|                          |                                             |                                                                                                                                                                                                                                                                                                                                                                                      |
|--------------------------|---------------------------------------------|--------------------------------------------------------------------------------------------------------------------------------------------------------------------------------------------------------------------------------------------------------------------------------------------------------------------------------------------------------------------------------------|
|                          |                                             | <i>'You'd have to check whether it was actually done. [Is it now?] No.'</i> (#12)                                                                                                                                                                                                                                                                                                    |
|                          | No check/feedback on effect (B)             | <i>'Did anything change? (...) Feedback needs to improve greatly, otherwise it's so useless.'</i> (#10)<br><i>'According to improvement cycles you need a check (...) also to see if it had the right effect.'</i> (#12)                                                                                                                                                             |
| <b>Reporting</b>         | System for routine AE reporting (F)         | <i>'You'd have to register otherwise you don't know what you're doing. It's a terrible task; I'm really bad at it. But yes, you have to, because you want to learn from your performance.'</i> (#5)                                                                                                                                                                                  |
|                          | Difficult access to data (B)                | <i>'[Omitted because] it's a lot of work to retrieve data or we don't really know it that well.'</i> (#12)                                                                                                                                                                                                                                                                           |
|                          | Lack of feedback from data (B)              | <i>'The feedback is lacking. If you (...) only infrequently hear about an adverse event, you don't apply it to yourself. (...) It's all about feedback! Register, feedback, show the real world.'</i> (#11)                                                                                                                                                                          |
| <b>Staff</b>             | Dedicated quality committee/group (F)       | <i>'(...) requires leadership to evoke actions at the right moments by saying 'OK now we have to do this and now that.' That requires a group within the department that stands for that.'</i> (#2).<br><i>'By embedding that [actions] in task forces because they'll put it on their agenda and have something to say about that topic, about quality.'</i> (#11)                  |
|                          | Super specialization (B)                    | <i>'It's difficult to find time to meet, because we all do different things. (...) We share the surgical department, but we don't share anything in terms of topics or daily practice.'</i> (#2)                                                                                                                                                                                     |
|                          | Staff turnover (B)                          | <i>'A hospital like this is run by temporarily staff, residents who rotate. You can't count on the collective memory, cause it disappears.'</i> (#3)<br><i>'Try to maintain such a thing! In the sense that, new people arrive constantly'</i> (#4)                                                                                                                                  |
|                          | Other/conflicting expectations of staff (B) | <i>'As long as we expect single individuals to fulfil all these requirements for clinical practice, research, training, leadership and management - we'll miss important moments. (...) that is the inhibiting factor! Too many tasks and too many different tasks.'</i> (#2)<br><i>'I find the work load on employees bizarre in certain cases. (...) It's just too much.'</i> (#3) |
| <b>Time</b>              | Overall lack of time (B)                    | <i>'All conferences.. apparently everyone is a lot busier than 10 years ago. There's no time.'</i> (#4)<br><i>'To do a good job [as presenter], takes a lot of time. I think that's the biggest bottleneck. I really think so, cause during working hours you just can't find the time for that.'</i> (#12)                                                                          |
|                          | Receiving dedicated time for QI (F)         | <i>'That [block OR time for M&amp;M] provides you the space. (...) Apparently it's what we need.'</i> (#9)<br><i>'If we decide, and acknowledge [the importance], then give half a day.. I think that we should organize it in such a way, that residents receive half a day to do these things. We'd have to.'</i> (#7)                                                             |
| <i>V) External level</i> |                                             |                                                                                                                                                                                                                                                                                                                                                                                      |
| <b>'Nature'</b>          | Inevitability of AEs (B)                    | <i>'Well.. whether you'd always learn from it.. in the sense that a year later they [AEs] will occur less often, I don't know. I think there's a certain lower limit you can't overcome.'</i> (#4)                                                                                                                                                                                   |
| <b>Other hospitals</b>   | Benchmarking (F)                            | <i>'It's nice to benchmark to the rest of the world. How often does this happen here and somewhere else.. what are renowned centres, what're there numbers (...) can make it very urgent.'</i> (#11)<br><i>'If we exceed the global or European incidence rates, then you'd have a need to assess that trend.'</i> (#6)                                                              |

QI, Quality Improvement. M&M, morbidity and mortality conference. AE, adverse event.

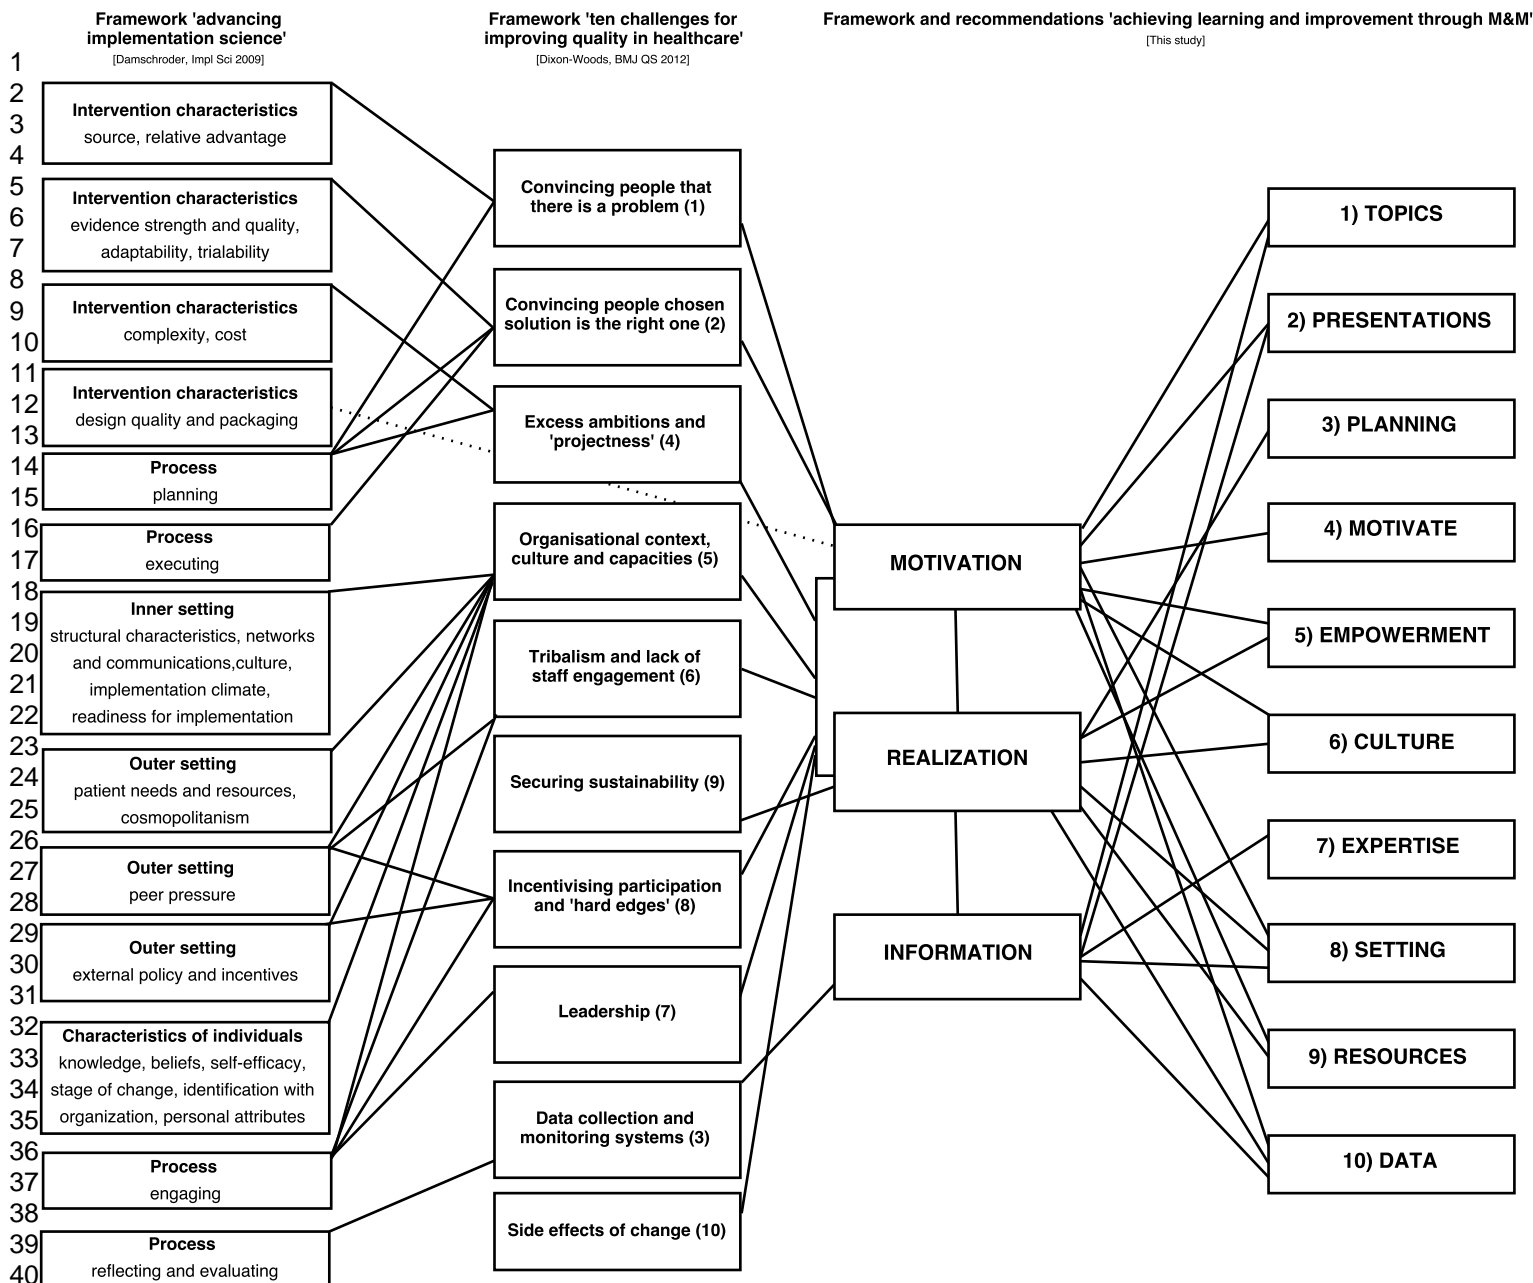

From left to right: 'Consolidated Framework For Implementation Research',<sup>1</sup> framework from 'Ten challenges for improving quality in healthcare',<sup>2</sup> and this study's pathways and recommendations for M&M. The relation between the first and second framework is depicted as described in the paper by Dixon-Woods et al.<sup>2</sup>

**References:**

<sup>1</sup> Damschroder L, et al. Fostering implementation of health services research findings into practice: a consolidated framework for advancing implementation science. *Implement Sci* 2009;4:50

<sup>2</sup> Dixon-Woods M, et al. Ten challenges in improving quality in healthcare: lessons from the Health Foundation's programme evaluations and relevant literature. *BMJ Qual Saf* 2012; 21:876-84.



## COREQ (CONsolidated criteria for REporting Qualitative research) Checklist

A checklist of items that should be included in reports of qualitative research. You must report the page number in your manuscript where you consider each of the items listed in this checklist. If you have not included this information, either revise your manuscript accordingly before submitting or note N/A.

| Topic                                          | Item No. | Guide Questions/Description                                                                                                                              | Reported on Page No. |
|------------------------------------------------|----------|----------------------------------------------------------------------------------------------------------------------------------------------------------|----------------------|
| <b>Domain 1: Research team and reflexivity</b> |          |                                                                                                                                                          |                      |
| <i>Personal characteristics</i>                |          |                                                                                                                                                          |                      |
| Interviewer/facilitator                        | 1        | Which author/s conducted the interview or focus group?                                                                                                   |                      |
| Credentials                                    | 2        | What were the researcher's credentials? E.g. PhD, MD                                                                                                     |                      |
| Occupation                                     | 3        | What was their occupation at the time of the study?                                                                                                      |                      |
| Gender                                         | 4        | Was the researcher male or female?                                                                                                                       |                      |
| Experience and training                        | 5        | What experience or training did the researcher have?                                                                                                     |                      |
| <i>Relationship with participants</i>          |          |                                                                                                                                                          |                      |
| Relationship established                       | 6        | Was a relationship established prior to study commencement?                                                                                              |                      |
| Participant knowledge of the interviewer       | 7        | What did the participants know about the researcher? e.g. personal goals, reasons for doing the research                                                 |                      |
| Interviewer characteristics                    | 8        | What characteristics were reported about the interviewer/facilitator? e.g. Bias, assumptions, reasons and interests in the research topic                |                      |
| <b>Domain 2: Study design</b>                  |          |                                                                                                                                                          |                      |
| <i>Theoretical framework</i>                   |          |                                                                                                                                                          |                      |
| Methodological orientation and Theory          | 9        | What methodological orientation was stated to underpin the study? e.g. grounded theory, discourse analysis, ethnography, phenomenology, content analysis |                      |
| <i>Participant selection</i>                   |          |                                                                                                                                                          |                      |
| Sampling                                       | 10       | How were participants selected? e.g. purposive, convenience, consecutive, snowball                                                                       |                      |
| Method of approach                             | 11       | How were participants approached? e.g. face-to-face, telephone, mail, email                                                                              |                      |
| Sample size                                    | 12       | How many participants were in the study?                                                                                                                 |                      |
| Non-participation                              | 13       | How many people refused to participate or dropped out? Reasons?                                                                                          |                      |
| <i>Setting</i>                                 |          |                                                                                                                                                          |                      |
| Setting of data collection                     | 14       | Where was the data collected? e.g. home, clinic, workplace                                                                                               |                      |
| Presence of non-participants                   | 15       | Was anyone else present besides the participants and researchers?                                                                                        |                      |
| Description of sample                          | 16       | What are the important characteristics of the sample? e.g. demographic data, date                                                                        |                      |
| <i>Data collection</i>                         |          |                                                                                                                                                          |                      |
| Interview guide                                | 17       | Were questions, prompts, guides provided by the authors? Was it pilot tested?                                                                            |                      |
| Repeat interviews                              | 18       | Were repeat interviews carried out? If yes, how many?                                                                                                    |                      |
| Audio/visual recording                         | 19       | Did the research use audio or visual recording to collect the data?                                                                                      |                      |
| Field notes                                    | 20       | Were field notes made during and/or after the interview or focus group?                                                                                  |                      |
| Duration                                       | 21       | What was the duration of the interviews or focus group?                                                                                                  |                      |
| Data saturation                                | 22       | Was data saturation discussed?                                                                                                                           |                      |
| Transcripts returned                           | 23       | Were transcripts returned to participants for comment and/or                                                                                             |                      |

| Topic                                  | Item No. | Guide Questions/Description                                                                                                        | Reported on Page No. |
|----------------------------------------|----------|------------------------------------------------------------------------------------------------------------------------------------|----------------------|
|                                        |          | correction?                                                                                                                        |                      |
| <b>Domain 3: analysis and findings</b> |          |                                                                                                                                    |                      |
| <i>Data analysis</i>                   |          |                                                                                                                                    |                      |
| Number of data coders                  | 24       | How many data coders coded the data?                                                                                               |                      |
| Description of the coding tree         | 25       | Did authors provide a description of the coding tree?                                                                              |                      |
| Derivation of themes                   | 26       | Were themes identified in advance or derived from the data?                                                                        |                      |
| Software                               | 27       | What software, if applicable, was used to manage the data?                                                                         |                      |
| Participant checking                   | 28       | Did participants provide feedback on the findings?                                                                                 |                      |
| <i>Reporting</i>                       |          |                                                                                                                                    |                      |
| Quotations presented                   | 29       | Were participant quotations presented to illustrate the themes/findings?<br>Was each quotation identified? e.g. participant number |                      |
| Data and findings consistent           | 30       | Was there consistency between the data presented and the findings?                                                                 |                      |
| Clarity of major themes                | 31       | Were major themes clearly presented in the findings?                                                                               |                      |
| Clarity of minor themes                | 32       | Is there a description of diverse cases or discussion of minor themes?                                                             |                      |

Developed from: Tong A, Sainsbury P, Craig J. Consolidated criteria for reporting qualitative research (COREQ): a 32-item checklist for interviews and focus groups. *International Journal for Quality in Health Care*. 2007. Volume 19, Number 6: pp. 349 – 357

**Once you have completed this checklist, please save a copy and upload it as part of your submission. DO NOT include this checklist as part of the main manuscript document. It must be uploaded as a separate file.**

## Standards for Reporting Qualitative Research (SRQR)\*

<http://www.equator-network.org/reporting-guidelines/srqr/>

**Study title** *'Barriers and facilitators to learning and improving through morbidity and mortality conferences: a qualitative study'*

### Title and abstract

|                                                                                                                                                                                                                                                       | Page/line no(s). |
|-------------------------------------------------------------------------------------------------------------------------------------------------------------------------------------------------------------------------------------------------------|------------------|
| <b>Title</b> - Concise description of the nature and topic of the study Identifying the study as qualitative or indicating the approach (e.g., ethnography, grounded theory) or data collection methods (e.g., interview, focus group) is recommended | Title page       |
| <b>Abstract</b> - Summary of key elements of the study using the abstract format of the intended publication; typically includes background, purpose, methods, results, and conclusions                                                               | P1/3-25          |

### Introduction

|                                                                                                                                                              |              |
|--------------------------------------------------------------------------------------------------------------------------------------------------------------|--------------|
| <b>Problem formulation</b> - Description and significance of the problem/phenomenon studied; review of relevant theory and empirical work; problem statement | P3/11-19     |
| <b>Purpose or research question</b> - Purpose of the study and specific objectives or questions                                                              | P3/25;P4/1-2 |

### Methods

|                                                                                                                                                                                                                                                                                                                                                                                                      |                 |
|------------------------------------------------------------------------------------------------------------------------------------------------------------------------------------------------------------------------------------------------------------------------------------------------------------------------------------------------------------------------------------------------------|-----------------|
| <b>Qualitative approach and research paradigm</b> - Qualitative approach (e.g., ethnography, grounded theory, case study, phenomenology, narrative research) and guiding theory if appropriate; identifying the research paradigm (e.g., postpositivist, constructivist/interpretivist) is also recommended; rationale**                                                                             | P5/3-10; P6/7-9 |
| <b>Researcher characteristics and reflexivity</b> - Researchers' characteristics that may influence the research, including personal attributes, qualifications/experience, relationship with participants, assumptions, and/or presuppositions; potential or actual interaction between researchers' characteristics and the research questions, approach, methods, results, and/or transferability | P6/9-18         |
| <b>Context</b> - Setting/site and salient contextual factors; rationale**                                                                                                                                                                                                                                                                                                                            | P5/14-22        |
| <b>Sampling strategy</b> - How and why research participants, documents, or events were selected; criteria for deciding when no further sampling was necessary (e.g., sampling saturation); rationale**                                                                                                                                                                                              | P5/8-10         |
| <b>Ethical issues pertaining to human subjects</b> - Documentation of approval by an appropriate ethics review board and participant consent, or explanation for lack thereof; other confidentiality and data security issues                                                                                                                                                                        | P5/11-12        |
| <b>Data collection methods</b> - Types of data collected; details of data collection procedures including (as appropriate) start and stop dates of data collection and analysis, iterative process, triangulation of sources/methods, and modification of procedures in response to evolving study findings; rationale**                                                                             | P5/6-25         |

|                       |                                                                                                                                                                                                                                                       |                                           |
|-----------------------|-------------------------------------------------------------------------------------------------------------------------------------------------------------------------------------------------------------------------------------------------------|-------------------------------------------|
| 1<br>2<br>3<br>4<br>5 | <b>Data collection instruments and technologies</b> - Description of instruments (e.g., interview guides, questionnaires) and devices (e.g., audio recorders) used for data collection; if/how the instrument(s) changed over the course of the study | P5/24- P6/4;<br>P6/7;16-20.<br>Appendix 1 |
| 6<br>7<br>8<br>9      | <b>Units of study</b> - Number and relevant characteristics of participants, documents, or events included in the study; level of participation (could be reported in results)                                                                        | P5/14-18                                  |
| 10<br>11<br>12<br>13  | <b>Data processing</b> - Methods for processing data prior to and during analysis, including transcription, data entry, data management and security, verification of data integrity, data coding, and anonymization/de-identification of excerpts    | P6/6-8                                    |
| 14<br>15<br>16<br>17  | <b>Data analysis</b> - Process by which inferences, themes, etc., were identified and developed, including the researchers involved in data analysis; usually references a specific paradigm or approach; rationale**                                 | P6/9-25                                   |
| 18<br>19<br>20<br>21  | <b>Techniques to enhance trustworthiness</b> - Techniques to enhance trustworthiness and credibility of data analysis (e.g., member checking, audit trail, triangulation); rationale**                                                                | P6/13-16                                  |

**Results/findings**

|                                  |                                                                                                                                                                                                   |                                            |
|----------------------------------|---------------------------------------------------------------------------------------------------------------------------------------------------------------------------------------------------|--------------------------------------------|
| 22<br>23<br>24<br>25<br>26<br>27 | <b>Synthesis and interpretation</b> - Main findings (e.g., interpretations, inferences, and themes); might include development of a theory or model, or integration with prior research or theory | P7-12;<br>table 1; box 1<br>appendix 3     |
| 28<br>29<br>30<br>31             | <b>Links to empirical data</b> - Evidence (e.g., quotes, field notes, text excerpts, photographs) to substantiate analytic findings                                                               | Quotes on P7-12;<br>table 1;<br>appendix 2 |

**Discussion**

|                                              |                                                                                                                                                                                                                                                                                                                                                                                                             |                       |
|----------------------------------------------|-------------------------------------------------------------------------------------------------------------------------------------------------------------------------------------------------------------------------------------------------------------------------------------------------------------------------------------------------------------------------------------------------------------|-----------------------|
| 32<br>33<br>34<br>35<br>36<br>37<br>38<br>39 | <b>Integration with prior work, implications, transferability, and contribution(s) to the field</b> - Short summary of main findings; explanation of how findings and conclusions connect to, support, elaborate on, or challenge conclusions of earlier scholarship; discussion of scope of application/generalizability; identification of unique contribution(s) to scholarship in a discipline or field | P13-16;<br>appendix 2 |
| 40<br>41<br>42                               | <b>Limitations</b> - Trustworthiness and limitations of findings                                                                                                                                                                                                                                                                                                                                            | P12/16-25             |

**Other**

|                      |                                                                                                                                               |     |
|----------------------|-----------------------------------------------------------------------------------------------------------------------------------------------|-----|
| 43<br>44<br>45<br>46 | <b>Conflicts of interest</b> - Potential sources of influence or perceived influence on study conduct and conclusions; how these were managed | P17 |
| 47<br>48<br>49       | <b>Funding</b> - Sources of funding and other support; role of funders in data collection, interpretation, and reporting                      | P17 |

1  
2  
3  
4  
5  
6  
7 \*The authors created the SRQR by searching the literature to identify guidelines, reporting standards, and critical  
8 appraisal criteria for qualitative research; reviewing the reference lists of retrieved sources; and contacting experts  
9 to gain feedback. The SRQR aims to improve the transparency of all aspects of qualitative research by providing  
10 clear standards for reporting qualitative research.

11 \*\*The rationale should briefly discuss the justification for choosing that theory, approach, method, or technique  
12 rather than other options available, the assumptions and limitations implicit in those choices, and how those choices  
13 influence study conclusions and transferability. As appropriate, the rationale for several items might be discussed  
14 together.

15  
16  
17  
18  
19  
20 **Reference:**

21 O'Brien BC, Harris IB, Beckman TJ, Reed DA, Cook DA. **Standards for reporting qualitative research: a**  
22 **synthesis of recommendations.** *Academic Medicine*, Vol. 89, No. 9 / Sept 2014  
23 DOI: 10.1097/ACM.0000000000000388  
24  
25  
26  
27  
28  
29  
30  
31  
32  
33  
34  
35  
36  
37  
38  
39  
40  
41  
42  
43  
44  
45  
46  
47  
48  
49  
50  
51  
52  
53  
54  
55  
56  
57  
58  
59  
60
