# Supplementary material for: Barriers and facilitators to learn and improve through morbidity and mortality conferences: a qualitative study
Source: PubMed Central journal article supplement — BMJ Open. 2017 Nov 12;7(11):e018833. doi: 10.1136/bmjopen-2017-018833 (PMC5695320; doi:10.1136/bmjopen-2017-018833), 2017-11-12
Supplement: bmjopen-2017-018833supp003.pdf [file bmjopen-2017-018833supp003.pdf]

**Appendix 3.** Relation of published frameworks for improvement in healthcare to this study's model of mediating pathways and practical recommendations.

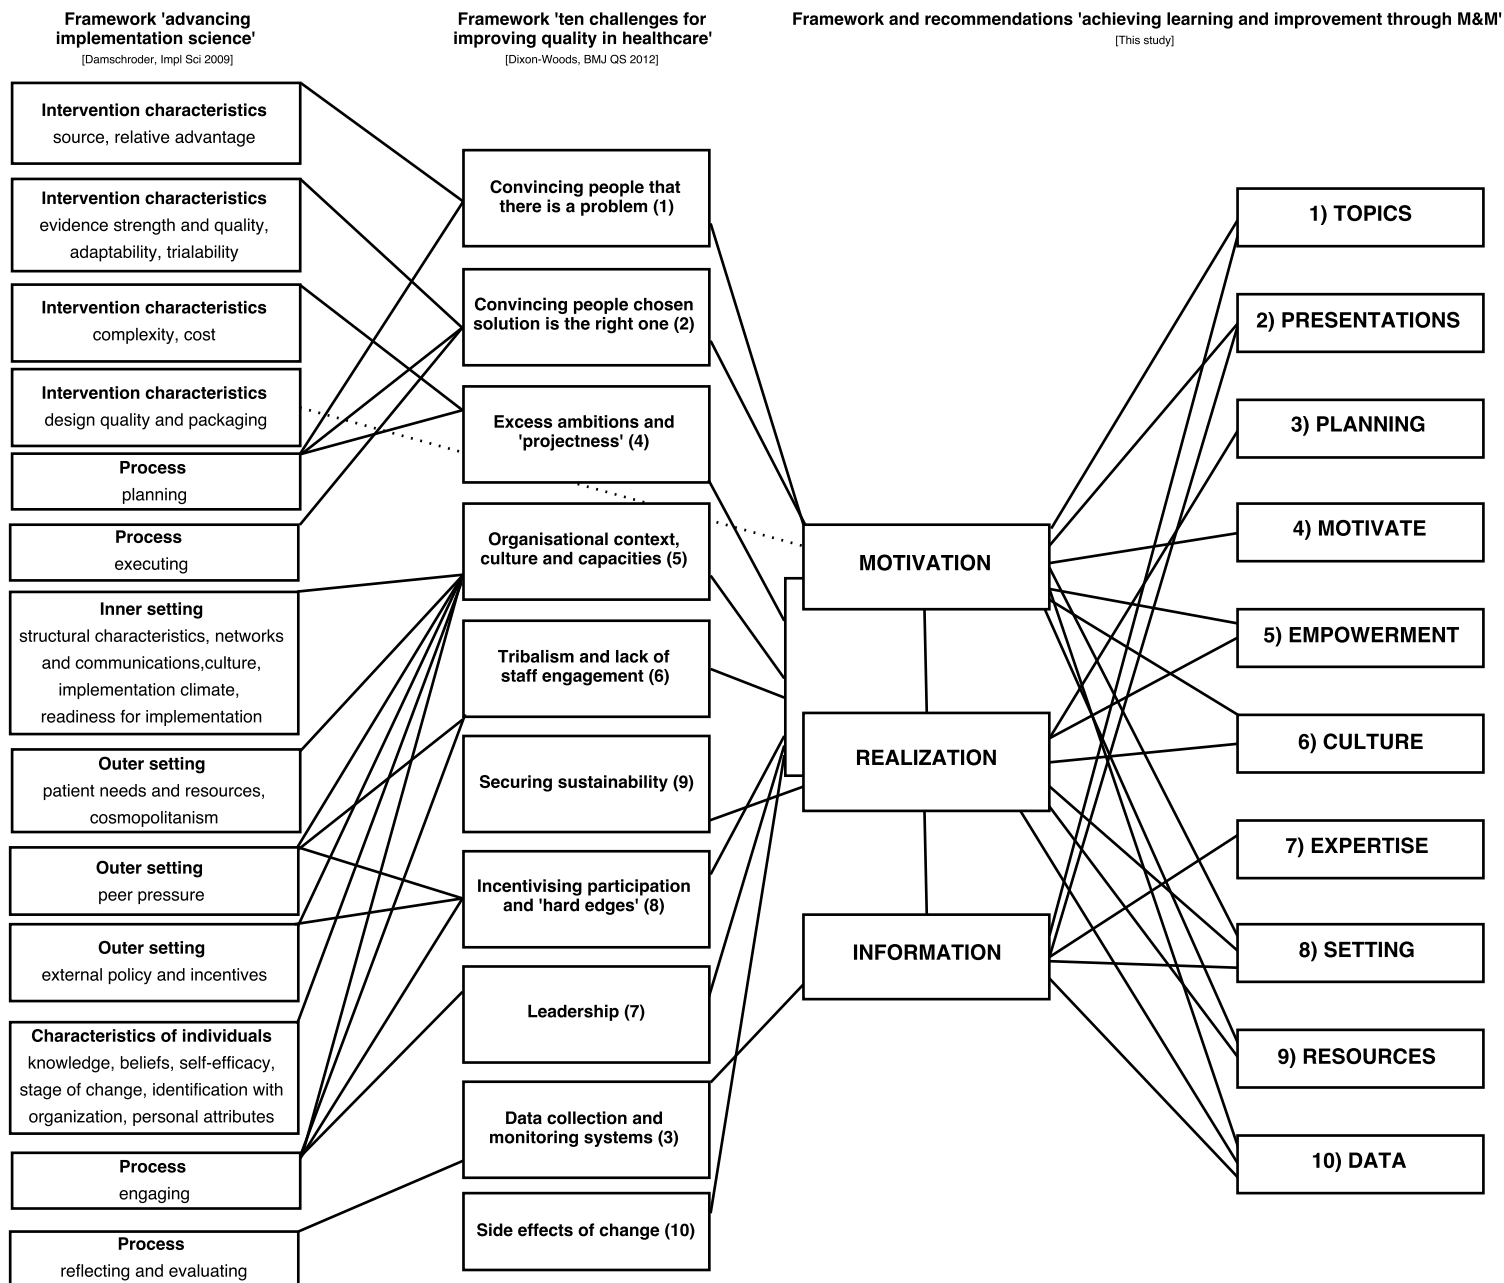

From left to right: 'Consolidated Framework For Implementation Research',<sup>1</sup> framework from 'Ten challenges for improving quality in healthcare',<sup>2</sup> and this study's pathways and recommendations for M&M. The relation between the first and second framework is depicted as described in the paper by Dixon-Woods et al.<sup>2</sup>

**References:**

- <sup>1</sup> Damschroder L, et al. Fostering implementation of health services research findings into practice: a consolidated framework for advancing implementation science. *Implement Sci* 2009;4:50
- <sup>2</sup> Dixon-Woods M, et al. Ten challenges in improving quality in healthcare: lessons from the Health Foundation's programme evaluations and relevant literature. *BMJ Qual Saf* 2012; 21:876-84.
